# Distinct Neural Signatures of Outcome Monitoring following Selection and Execution Errors

Faisal Mushtaq<sup>\*1</sup>, Samuel D. McDougle<sup>2</sup>, Matt P. Craddock<sup>3</sup>, Darius E. Parvin<sup>4,5</sup>, Jack Brookes<sup>1</sup>, Alexandre Schaefer<sup>6</sup>, Mark Mon-Williams<sup>1</sup>, Jordan A. Taylor<sup>7,8</sup> & Richard B. Ivry<sup>4,5</sup>

<sup>1</sup>School of Psychology, University of Leeds, Leeds, West Yorkshire, United Kingdom

<sup>2</sup>Department of Psychology, Yale University, New Haven, CT, USA

<sup>3</sup>School of Psychology, University of Lincoln, Lincoln, United Kingdom

<sup>4</sup>Department of Psychology, University of California, Berkeley, CA, USA

<sup>5</sup>Helen Wills Neuroscience Institute, University of California, Berkeley, CA, USA

<sup>6</sup>Department of Psychology, Jeffrey Cheah School of Medicine and Health Sciences, Monash University Malaysia, Malaysia

<sup>7</sup>Department of Psychology, Princeton University, Princeton, NJ, USA

<sup>8</sup>Princeton Neuroscience Institute, Princeton University, Princeton, NJ, USA

\*Correspondence can be addressed to Faisal Mushtaq, School of Psychology, Faculty of Medicine and Health, University of Leeds, Leeds, LS2 9JT, UK; email: [f.mushtaq@leeds.ac.uk](mailto:f.mushtaq@leeds.ac.uk)

Abbreviated Title: ERP Correlates of Execution and Selection Error

Number of Pages: 39

Number of Figures: 6

**Conflicts of Interest:** The authors declare no competing financial interests.

**Acknowledgements:** The authors would like to thank Dr. Zeynep Uludag for her assistance with data collection and Dr. Assaf Breska for helpful discussions on an earlier draft of the manuscript. F.M and M.M-W were supported by Fellowships from the Alan Turing Institute and a Research Grant from the EPSRC (EP/R031193/1). J.A.T was supported by NS084948 from the National Institutes of Health (USA). R.B.I and D.E.P were supported by NS092079 and NS116883 from the National Institutes of Health (USA). S.D.M was supported by F32MH119797 from the National Institutes of Health (USA).

## 36 Abstract

37 Losing a point in tennis could result from poor shot selection or faulty stroke execution. To explore  
38 how the brain responds to these different types of errors, we examined feedback-locked EEG  
39 activity while participants completed a modified version of a standard three-armed bandit  
40 probabilistic reward task. Our task framed unrewarded outcomes as either the result of errors of  
41 selection or errors of execution. We examined whether amplitude of the medial frontal negativity  
42 (the Feedback-Related Negativity/Reward Positivity; FRN/RewP) was sensitive to the different  
43 forms of error attribution. Consistent with previous reports, selection errors elicited a large  
44 FRN/RewP relative to rewards and amplitude of this signal correlated behavioral adjustment  
45 following these errors. A different pattern was observed in response to execution errors. These  
46 outcomes produced a larger FRN/RewP, a frontal attenuation in activity preceding this component,  
47 and a subsequent enhanced error positivity in parietal sites. Notably, the only correlations with  
48 behavioral adjustment were with the early frontal attenuation and amplitude of the parietal signal;  
49 FRN/RewP differences between execution errors and rewarded trials did not correlate with  
50 subsequent changes in behavior. Our findings highlight distinct neural correlates of selection and  
51 execution error processing, providing insight into how the brain responds to the different classes of  
52 error that determine future action.

53

54 **Key words:** Credit Assignment, Medial Frontal Negativity, Feedback-Related Negativity, Prediction  
55 Error, Reinforcement Learning

## 56 Introduction

57 When an action fails to produce the desired goal, there is a “credit assignment” problem to resolve:  
58 Did the lack of reward occur because the wrong course of action was selected, or was it because  
59 the selected action was poorly executed? Consider a tennis player who, mid-game, must  
60 determine whether losing the last point was the result of selecting the wrong action or executing  
61 the action poorly. The player might have attempted a lob rather than the required passing shot, an  
62 error in action selection. Alternatively, a lob might have been appropriate but hit with insufficient  
63 force, an error in motor execution.

64 Reinforcement learning presents a framework for understanding adaptive behavior through  
65 trial and error interactions with the environment. According to numerous models (e.g. temporal  
66 difference learning; Sutton & Barto, 1998), the discrepancy between expected and actual  
67 outcomes, the reward prediction error, provides a learning signal that allows an agent to refine its  
68 predictions and update its action selection policy. But what happens when a negative prediction  
69 error could arise from either poor action selection or poor response execution?

70 To address this question, McDougle et al. (2016) used a “bandit” task in which participants  
71 chose between two stimuli to maximize reward. In one condition, choices were made using a  
72 standard button-press method, a situation in which the negative prediction errors on unrewarded  
73 trials were attributed to poor action selection (given the negligible demands on motor execution). In  
74 a second condition, choices were made by reaching to the desired bandit. Here, unrewarded trials  
75 were attributed to movement execution errors. In the latter condition, participants strongly  
76 discounted the negative prediction errors on unrewarded trials relative to the former condition. The  
77 authors hypothesized that errors credited to the motor execution system block value updating in  
78 the action selection system. Consistent with this hypothesis, McDougle et al. (2019) reported that  
79 reward prediction error coding in the human striatum was attenuated following execution errors,  
80 relative to selection errors. Differences between responses to selection and execution errors have  
81 been attributed to a greater sense of “agency” in the latter, with participants’ choice biases  
82 indicating a belief that they can reduce execution errors by making more accurate movements  
83 (Parvin et al., 2018).

84 A window into the processes that underlie outcome monitoring is offered through the  
85 discovery of the Feedback-Related Negativity (FRN), a negative deflection in the EEG first  
86 identified following the presentation of feedback indicating incorrect responses (Miltner et al.,  
87 1997). After its identification, the component quickly became the subject of intense investigation as  
88 a marker signaling gains and losses (Gehring & Willoughby, 2002) and outcomes that are worse  
89 than expected (Holroyd et al., 2006). The most prominent explanation of its significance, the  
90 “reinforcement learning theory of the error-related negativity” (RL-ERN; Holroyd & Coles, 2002)  
91 holds that the component indexes the activity of signals from the midbrain dopamine that are  
92 conveyed to the anterior cingulate cortex for adaptive modification of behaviour (Holroyd & Coles,  
93 2002; Holroyd & Umemoto, 2016). Recent developments reveal that much of the variation in this

94 component is driven a positive going component (a Reward Positivity; RewP) responding to  
95 outcomes that are better than expected (Foti et al., 2011; Holroyd et al., 2008; Proudfit, 2015).  
96 Irrespective of whether this signal (referred to as the “FRN/RewP” from here onwards) is framed as  
97 a feedback negativity or reward positivity, there is a consensus (as indicated by a meta-analysis of  
98 55 datasets; Sambrook & Goslin, 2015), that it is sensitive to reward prediction error.

99 The FRN/RewP’s sensitivity to errors of action is more contentious. A series of experiments  
100 (Krigolson et al., 2008; Krigolson & Holroyd, 2006, 2007a) contrasting high level (goal-attainment)  
101 errors, variously operationalized as a failure to reach a target (Krigolson et al., 2008; Krigolson &  
102 Holroyd, 2007a), avoid a collision (Krigolson & Holroyd, 2006, 2007b), and the erroneous selection  
103 of the wrong hand or force (de Bruijn et al., 2003) with low-level errors (i.e. mismatch between  
104 actual and intended motor command), concluded that the latter do not elicit a FRN/RewP. Instead,  
105 reflecting a hierarchical error processing system (Krigolson & Holroyd, 2006), these motor errors  
106 are proposed to be mediated within posterior parietal cortex (Desmurget et al., 1999, 2001;  
107 Diedrichsen, 2005). Further elaborations indicated that the FRN/RewP may only be generated for  
108 action errors that cannot be corrected (Krigolson et al., 2008; Krigolson & Holroyd, 2007a),  
109 indicating a binary high level coding of outcomes in the FRN/RewP (i.e. signaling whether the goal  
110 was achieved or not). In line with this, a recent experiment isolating reward-based and sensory  
111 error-based motor adaptation reported a FRN/RewP in response to binary reward feedback, but  
112 not sensory error feedback- which instead generated a P300 (Palidis et al., 2019). Previous work  
113 on the P300’s sensitivity to “low level” motor execution errors led to the proposal that this later  
114 parietally distributed component might reflect the revision of an internal forward model in posterior  
115 parietal cortex (Krigolson & Holroyd, 2007a).

116 A contrasting set of results suggest that the FRN/RewP (and its response-locked variant,  
117 the ERN) may in fact be sensitive to motor errors and reflect more than binary coding of outcomes,  
118 with evidence showing that it scales with the magnitude of error during sensorimotor adaptation  
119 (Anguera et al., 2009) and correlates with the size of hand-path deviations following externally  
120 perturbation to target reaches (Torrecillos et al., 2014). These findings are more in line with a  
121 growing body of work suggesting that the FRN/RewP indexes a general salience prediction error  
122 (Oliveira et al., 2007; Torrecillos et al., 2014). A computational model attempting to unify a broad  
123 range of findings on medial prefrontal cortex function (Alexander & Brown, 2011) proposes that this  
124 region is responsible for tracking discrepancies between expectations and outcomes, which are  
125 reflected in the FRN/RewP. Viewed in this way, the processing of execution and selection error  
126 may share a common neural network that signals a mismatch between the outcome and  
127 expectations in the service of behavioural adaptation (Cavanagh et al., 2012; Torrecillos et al.,  
128 2014).

129 To test whether outcome errors of action and selection can be dissociated in the medial  
130 frontal cortex, we recorded feedback-locked ERPs while participants engaged in a modified bandit  
131 task where choices were selected via rapid arm movements. Unrewarded trials were either framed

132 as errors in choosing the wrong bandit (a selection error) or the result of an inaccurate movement  
133 (an execution error). Following a large body of evidence reporting that the FRN is sensitive to RPE  
134 (Sambrook & Goslin, 2015), we expected that unrewarded outcomes attributed to selection error  
135 would elicit an FRN/RewP response. If this medial frontal monitoring system also tracks general  
136 action-outcome discrepancies, then we should expect a deflection following errors of action  
137 execution too. However, should the recently proposed movement-dependent account of RL hold,  
138 the FRN/RewP response should be attenuated when errors can be ascribed to the motor system.  
139 We would expect P300 amplitude, as a putative index of internal forward model revision (Krigolson  
140 & Holroyd, 2007a), should be largest for execution errors.

141 In addition to these predictions, we also examined the relationship between the FRN/RewP  
142 and behavioral modification. Specifically, we predicted that participants who exhibited a larger  
143 change in the FRN/RewP would be more likely to switch between the different options. Notably, we  
144 expected this brain-behavior relationship would hold for selection errors, but not for execution  
145 errors. Reasoning that action errors may instead be encoding information about the size of the  
146 execution error, with this feedback used to correct discrepancies between the planned and actual  
147 outcome, we explored the possibility that these signals may be correlated with the magnitude of  
148 error and subsequent change in motor response.

## 149 Materials and Methods

### 150 Participants

151           Using an effect size estimate derived from our previously published work on the FRN/RewP  
152 ( $\eta^2_p = .167$ ; Mushtaq et al., 2016), with a desired statistical power of 0.8 and alpha criterion set at  
153 0.05, we set a minimum sample size of 28 participants. In total we tested thirty-two right-handed  
154 participants ( $EHI > 40$ ; Oldfield, 1971). Two participants were excluded due to excessive EEG  
155 artifacts, and a technical error during data collection rendered one participant's dataset unusable.  
156 All analyses were performed on the resulting sample of 29 participants (19 females, 10 males,  $\mu$   
157 age = 26.75 years,  $\pm 9.51$  years).

158           Participants were told they would be remunerated based on their performance. However,  
159 due to the pseudo-veridical nature of outcomes (see Procedure), all received a fixed payment of  
160 £10.00. Participants signed an informed consent document, were fully debriefed, and the  
161 experiment was approved by the Ethics Committee in the School of Psychology at the University of  
162 Leeds, United Kingdom.

## 163 Design and Procedure

164 We employed a novel three-armed bandit task (**Figure 1**) where the absence of reward on a given  
165 trial could be the product of a poorly executed action or an error in action selection (McDougle et  
166 al., 2019). Following EEG set-up, the participant was seated in a chair approximately 50 cm away  
167 from a 24" ASUS monitor (53.2 X 30 cm [2560 x 1600 pixels], 100 Hz refresh rate). The participant  
168 was instructed to make a choice by making a reaching movement, sliding their right arm across a  
169 graphics tablet (49.3 X 32.7 cm, Intuos 4XL; Wacom, Vancouver, WA) while holding a digitizing  
170 pen encased inside a customized air hockey paddle. The tablet was placed below the monitor on  
171 the table and between an opaque platform that occluded the hand.

172 The experimental session comprised 400 trials, with opportunity for self-paced breaks. To  
173 initiate each trial, the participant made a reaching movement, sliding their right arm to position a  
174 white cursor (diameter of 0.5 cm) inside the home position, indicated by a solid white circle at the  
175 center of the screen. After maintaining this position for 400 ms, the start circle turned green and  
176 three bandits appeared on the screen (positioned at a radial distance 8 cm from the center at 90°,  
177 210° and 330° degrees relative to the origin). The bandits were colored light blue, dark blue, or  
178 purple and the color-position mappings were maintained for the entire experiment (randomized  
179 across participants).

180 Following the appearance of the 3 bandits, participants had 2 seconds to initiate a reaching  
181 movement. If the reaction time (RT) was greater than 2 s, the trial was aborted and the message  
182 "Too Slow" appeared. After movement onset, participants had 1 s (Movement Time; MT) to  
183 complete a rapid straight-line "shooting" movement through one of the bandits. Upon movement  
184 initiation, the cursor indicating hand position disappeared and did not reappear until feedback  
185 presentation. If the movement was not completed within the required 1 s window, the trial was  
186 terminated and the error message "Too Slow" was displayed. If the movement was completed  
187 within the 1 s window, there were three possible outcomes: If the movement was accurate (hand  
188 passed through the bandit) the cursor was displayed within the spatial extent of the bandit. On  
189 these trials, there were two possible outcomes: (1) The bandit could turn green, indicating that a  
190 reward would be earned for the trial (reward outcome), or (2) the bandit would turn red, indicating  
191 that, while the movement was accurate, no reward would be given on that trial (selection error). If  
192 the movement missed the bandit, a cursor would appear indicating the position when the hand was  
193 at the radial distance of the bandits, and thus indicate if the execution error was clockwise or  
194 counterclockwise relative to the target. The bandit would turn yellow, further signaling an execution  
195 error. Participants were informed of the three possible outcomes prior to the start of the experiment  
196 and presented with demonstrations of the three outcomes.

197 Following McDougle et al. (McDougle et al., 2019), each bandit had its own fixed  
198 probabilities for the three trial outcomes. All bandits had a 40% reward outcome, and thus, the  
199 expected value for the three bandits were identical. However, the frequency of selection error and

200 execution error trials varied. For one bandit, 50% of the trials resulted in execution errors and 10%  
201 resulted in selection errors. We refer to this as the “High Execution/Low Selection Error” bandit. A  
202 second bandit resulted in execution errors on 10% of trials and 50% resulted in selection errors (a  
203 “Low Execution/High Selection Error” bandit). A third, “Neutral” bandit produced an equal number  
204 (30%) of execution and selection errors.

205 To achieve these probabilities, outcomes were surreptitiously perturbed so that they aligned  
206 with predetermined feedback (a randomized sequence for each run) for the selected bandit. On  
207 trials in which the actual movement produced the desired outcome in terms of hitting or missing the  
208 bandit, the cursor was shown at its veridical position. However, if the participant’s movement  
209 missed the bandit, but the trial outcome was set as either a reward or selection error (i.e.,  
210 outcomes requiring successful motor execution), the feedback showed the cursor landing inside  
211 the bandit, albeit near the side consistent with the actual hand position. Conversely, where a trial  
212 was set to be an execution error, but the stylus successfully intersected the bandit, the cursor was  
213 shifted just outside the bandit, with the side again consistent with the actual hand position (e.g., if  
214 the hit was slightly clockwise to the center of the bandit, the cursor appeared outside the spatial  
215 boundary of the bandit on the clockwise side). On trials in which feedback needed to be perturbed  
216 (i.e., deliver a false hit or false miss) to control the frequency of outcomes, the cursor position was  
217 shifted by randomly sampling from a normal distribution ( $\pm 6.24^\circ$ , equivalent to .5 cm with an 8 cm  
218 reach) until a new cursor position was chosen that landed inside the bandit (for false hits) or  
219 outside the bandit (false misses).

220 We included three further constraints to minimize the likelihood that participants would  
221 recognize that the outcomes were not always directly reflective of their movements: (i) No online  
222 movement feedback was available; (ii) end-point feedback was presented 1 s after the stylus had  
223 passed the bandit location (this also helped reduce the impact of motor artefacts contaminating the  
224 ERP); and (iii) if the actual reaching angle was greater than  $10^\circ$  from the closest bandit on any trial  
225 (irrespective of the set outcome), no outcome was shown, the experiment software instructed  
226 participants to “Please Reach Closer to the Bandit.” Trials in which the movement was not  
227 completed within 1 s of the onset of the bandits or in which the reach angle was greater than  $10^\circ$   
228 from the closest bandit were repeated, ensuring a full data set of 400 trials for each participant.

229 To increase motivation, participants were told that at the end of the experiment the software  
230 would randomly select five trials, and based on the outcomes from these trials, a cash bonus  
231 between £1-5 would be provided. As such, the goal was to accumulate as many reward trials as  
232 possible. In actuality, all participants received a fixed payment of £10 for taking part in the  
233 experiment.

234 Finally, given that it is possible that the execution error feedback could be interpreted in  
235 different ways (for example, participants may have assumed these errors were the result of faulty  
236 technical equipment), participants were invited to complete a brief post-experiment survey where  
237 they were asked to rate their agreement with the statement “I felt that that the miss (yellow)



238 outcomes were the result of poor arm reaches" on a 7-point Likert scale, where a score of 7  
239 indicated strongly agree and 1 indicated strongly disagree. From 21 respondents, a mean score of  
240 5.57 (SD = 1.6), which was statistically significantly different to the mid-point (neither agree nor  
241 disagree) on the scale ( $t(20) = 4.41$ ,  $p < .001$ ), indicated general agreement with the intended  
242 experimental manipulation.

243 The experimental task was programmed using the Psychophysics Toolbox (Brainard, 1997;  
244 Kleiner et al., 2007) and lasted approximately 35 minutes, with an additional 25-30 minutes of  
245 technical set up for EEG data acquisition.

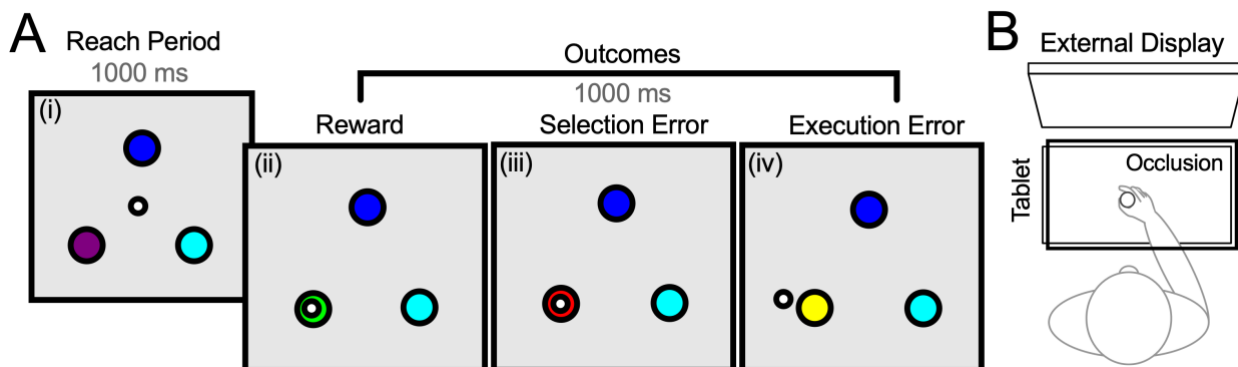

246  
247 **Figure 1- Experimental Task:** (A) Participants moved a stylus on a tablet to make rapid shooting  
248 movements (i) through one of 3 bandits (large circles) at 90°, 210° and 330° degrees relative to the  
249 home position (small circle). Following a 1000 ms delay (not pictured), pseudo-veridical feedback (white  
250 cursor) was provided indicating if the outcome was a reward (ii), a selection error (iii) or an execution  
251 error (iv). (B) The hand was occluded throughout, and stimuli were presented on a monitor positioned in  
252 front of the participants at approximately eye level.

253

## 254 Electrophysiological data recording and preprocessing

255 EEG data were recorded continuously from 64 scalp locations at a sampling rate of 1024 Hz using  
256 a BioSemi Active-Two amplifier (BioSemi, Amsterdam). Four electrooculograms (EOG) – above  
257 and below the left eye, and at the outer canthi of each eye – were recorded to monitor eye  
258 movements. Two additional electrodes were placed on the left and right mastoids. The CMS and  
259 DRL active electrodes placed close to the Cz electrode of the international 10-20 system served as  
260 reference and ground electrodes, respectively. EEG pre-processing was performed using the  
261 EEGLAB (Delorme & Makeig, 2004) and Fieldtrip (Oostenveld et al., 2011) toolboxes, combined  
262 with in-house procedures running using Matlab (The MathWorks, Inc., Natick, Massachusetts).

263 All data were first re-referenced offline to the average of all channels, and downsampled  
264 from 1024 Hz to 256 Hz. The continuous time series data were filtered using a high-pass filter with  
265 a cut-off at 0.1 Hz (Kaiser windowed-sinc FIR filter, beta = 5.653, transition bandwidth = .2 Hz,  
266 order = 4638) and a low-pass filter with a cut-off at 30 Hz (Kaiser windowed-sinc FIR, beta = 5.653,  
267 transition bandwidth = 10 Hz, order = 126). A second filtering of the data was performed for  
268 subsequent independent component analysis using a high-pass filter cut-off at 1 Hz (Kaiser  
269 windowed-sinc FIR filter, beta = 5.653, transition bandwidth = 2 Hz, order = 4666). ICA typically  
270 attains better decompositions on data with a 1 Hz high-pass filter (Winkler et al., 2015). The data

271 were segmented into epochs beginning 1s before and lasting 1s after the onset of feedback.

272 Infomax ICA, as implemented in the EEGLAB toolbox, was run on the 1 Hz high-pass-filter  
273 epoched data, and the resulting component weights were copied to the .1 Hz high-pass-filter  
274 epoched data. All subsequent steps were conducted on the .1 Hz high-pass-filtered data.  
275 Potentially artefactual components were selected automatically using SASICA (Chaumon et al.,  
276 2015), based on low autocorrelation, high channel specificity, and high correlation with the vertical  
277 and horizontal eye channels. The selections were visually inspected for verification purposes and  
278 adjusted when necessary. After removal of artefactual components, the Fully Automated Statistical  
279 Thresholding for EEG Artefact Rejection plugin for EEGLAB (Nolan et al., 2010) was used for  
280 general artefact rejection and interpolation of globally and locally artefact contaminated channels,  
281 supplemented by visual inspection for further periods of non-standard data, such as voltage jumps,  
282 blinks, and muscle noise.

283 Following artifact-removal, 93.5% of total trials were available for analysis. There was no  
284 difference in the percentage of trials removed across conditions ( $F(2, 56) = 2.09, p = .133$ ).  
285 However, as a product of the experimental design, there was a difference in the total number of  
286 trials across the conditions ( $F(2, 56) = 85.2, p < .001$ ), with more reward trials ( $\mu = 150, \pm 9$ )  
287 available for analysis relative to execution error ( $\mu = 114, \pm 12; t(28) = 12.21, p < .001$ ) and  
288 selection error trials ( $\mu = 110, \pm 11; t(28) = 13.89, p < .001$ ). There was no difference in trial counts  
289 for the two types of errors ( $t(28) = .82, p = .693$ ). To increase the reliability of our conclusions by  
290 addressing potential problems of distribution abnormalities and outliers, averaged waveforms were  
291 constructed for each individual by taking the bootstrapped ( $n = 100,000$ ) means from the EEG time  
292 series epochs. The waveforms were baseline corrected using a 200 ms time window pre-feedback  
293 onset.

294

## 295 **ERP Quantification**

296 Given that we had specific hypotheses, we focused our analysis on two locations. First,  
297 meta-analyses (Sambrook & Goslin, 2015; Walsh & Anderson, 2012) have shown the feedback-  
298 locked FRN/RewP effect to be maximal over the frontocentral region of the scalp. As such, we  
299 averaged activity across three frontocentral electrodes FC1, FCz, and FC2. Second, given that the  
300 P300 (specifically, the P3b sub-component) is commonly present in feedback-locked ERPs and  
301 typically maximal over parietal electrodes (Polich, 2007), we averaged over electrodes P1, Pz, and  
302 P2. Averaging across electrodes improves the signal-to-noise ratio of the ERP measures (Oken &  
303 Chiappa, 1986).

304 To test whether our results might be biased by the specific configurations of electrodes  
305 included in the averaged cluster and use of bootstrapped waveforms, we calculated the similarity  
306 between four different approaches to calculating the ERPs: (i) grand averaged activity from the raw  
307 waveforms in the clustered electrodes, (ii) grand averaged activity from the bootstrapped  
308 waveforms in the clustered electrodes, (iii) grand averaged activity from raw waveforms from a

309 single electrode (FCz for frontal analysis and Pz for parietal); and (iv) grand averaged activity from  
310 bootstrapped means extracted from a single electrode. An intraclass correlation coefficient  
311 indicated a high level of agreement between all four approaches (Frontal ICC = .995, 95% CI  
312 0.989- 0.997; Parietal ICC: = .996, 95% CI 0.994- 0.997). Clustered bootstrapped averaged ERP  
313 waveforms are reported here.

314 With growing evidence that most of the variation in the FRN/RewP is driven by a reward  
315 positivity, we decided to make use of difference waveforms for our analysis to detect differences  
316 irrespective of whether they were driven by positive or negative deflections in the ERP (Krigolson,  
317 2018). A difference waveform procedure has the added benefit of more easily isolating the  
318 FRN/RewP from components that precede (P2) and follow (a large P3 component comprising a  
319 frontal P3a and parietal P3b), eliminating activity in common between two conditions (Kappenman  
320 & Luck, 2017). The majority of research on the FRN/RewP has typically computed “reward  
321 prediction error” (RPE) difference waveforms, derived by subtracting error/loss trials from reward  
322 trials (Sambrook & Goslin, 2015). Here, we created a “Selection Error” difference waveform by  
323 subtracting the average activity associated with Selection Error trials from the average activity  
324 related to all Reward trials, and an “Execution Error” difference waveform by subtracting the  
325 average activity associated with Execution Error trials from the average activity associated with  
326 Reward trials. Finally, we directly contrasted Execution and Selection Error ERPs by subtracting  
327 the Execution Error waveform from the Selection Error waveform to create an “Error Sensitivity”  
328 difference waveform. For statistical analysis, the parent waveform outcome trials were subjected to  
329 a one-way ANOVA and where main effects emerged, one-sample t tests were conducted to  
330 identify where these difference waveforms were significantly different to zero.

331 To reduce the number of false positives (Luck & Gaspelin, 2017), the ERP data were  
332 downsampled to 250 Hz and only activity between 150 and 500 ms (spanning the P2, FRN/RewP  
333 and P3 ERPs) was analysed. For each analysis, p values were corrected by applying a false  
334 discovery rate (FDR) control algorithm (Benjamini & Hochberg, 1995; Lage-Castellanos et al.,  
335 2010). The Benjamin-Hochberg correction approach was adopted as previous studies have shown  
336 it to reliably control the FDR when data are correlated, even when the number of comparisons are  
337 relatively small (Hemmelmann et al., 2005). This method is also ideally suited for the exploration of  
338 focally distributed effects (Groppe et al., 2011).

339 To aid the interpretation of the difference waveforms, we first visualised the grand averaged  
340 ERPs related to each outcome. For every statistically significant contrast, we present the mean  
341 amplitude from the cluster for each parent waveform. Differences between relevant conditions at  
342 each electrode site are also visualized through topographical maps to support interpretation of  
343 underlying components: Predicated on previous research (Walsh & Anderson, 2012), we  
344 anticipated that the FRN/RewP should show a frontocentral topography and, following an early  
345 frontocentral peak, there would be a subsequent posterior maximum corresponding to the P3b  
346 sub-component of the P300 (Holroyd & Krigolson, 2007).

## 347 Brain-Behavior Relationships

348 A key question in this study is whether electrophysiological signatures of different types of  
349 outcomes correlate with the participants' choice behavior (see San Martín, 2012 for a review).  
350 Based on a reinforcement learning account of the FRN/RewP (Holroyd and Coles, 2002), we would  
351 expect the amplitude of the FRN/RewP to scale with the degree of behavioral adjustment: large  
352 differences in the FRN/RewP should be more likely to lead to changes in choice behavior  
353 compared to small differences in the FRN/RewP. Here we can ask this question with respect to  
354 both selection and execution errors.

355 To examine brain-behavior correlations, we calculated a behavioral adjustment score, or  
356 "Switch Bias" rate, for each participant (operationalized as the ratio of the percentage of trials that  
357 the participant switched following an error to the percentage of switching following a reward). This  
358 served as an intuitive index of how much participants favored one outcome over another. Mean  
359 amplitudes from the statistically significant clusters of EEG activity were then correlated with these  
360 behavioral adjustment scores.

361 Rather than signaling a need to switch from one target to another, feedback from Execution  
362 Errors might be more readily used to modify a motor plan for future action. To quantify the  
363 magnitude of cursor error, we calculated the angular deviation of the cursor relative to the center of  
364 the selected target. The degree of motor correction was examined on a subset of data where  
365 participants selected the same target on consecutive trials and quantified as the degree of angular  
366 change in hand position relative to cursor position on the previous outcome. Mean cursor error and  
367 motor correction scores were correlated with mean amplitudes from the previously identified  
368 statistically significant clusters of EEG activity.

369

## 370 Statistical Analysis

371 For reporting purposes, time points are rounded to the nearest millisecond, amplitude (in  
372 microvolts;  $\mu\text{V}$ ) to two decimal places and p values to three decimal places. The range for the  
373 scalp maps was time-interval specific and determined by the 1st and 99th percentile values across  
374 all electrodes. Spearman's rho ( $r_s$ ) was used to examine correlations between amplitude and  
375 behavior. For correlations between behavior and neural activity, peak and mean amplitudes were  
376 extracted. Both are reported and the strongest correlations are visualized. Where appropriate,  
377 pairs of correlations were directly compared with Hittner, May, and Silver's (2003) modification of  
378 Dunn and Clark's (1969) approach, using a back-transformed average Fisher's Z procedure as  
379 implemented in the R package Cocor v. 1.1-3 (Diedenhofen & Musch, 2015). The statistical  
380 significance threshold was set at  $p < .05$ . Generalized eta squared ( $\eta_G^2$ ) is used as a measure of  
381 effect size for repeated measures ANOVAs. This measure was selected over eta squared and  
382 partial eta squared because it provides comparability across between- and within-subjects designs  
383 (Bakeman, 2005; Olejnik & Algina, 2003); we considered  $\eta_G^2 = 0.02$  to be small,  $\eta_G^2 = 0.13$  medium  
384 and  $\eta_G^2 = 0.26$  to be a large effect size. All statistical analyses were performed using R (R Core  
385 Team, 2015).

## 386 Results

### 387 Behavioral Responses

388 A one-way ANOVA revealed a significant difference in bandit preference ( $F [2, 56] = 8.27, p$   
389  $< .001, \eta^2_g = .23$ ), with participants exhibiting bias towards the High Execution/Low Selection Error  
390 bandit. Overall, this bandit was chosen on average on 39% (SE = 2%) of the trials, which was  
391 significantly greater than the Low Execution/High Selection error bandit (M = 29%; SE = 1%;  $t(28)$   
392  $= 4.03, p = .001$ ) and Neutral bandit (M = 32%; SE = 2%;  $t(28) = 2.58, p = .046$ ), with no difference  
393 for the latter two ( $t(28) = 1.07, p = .877$ ). Consistent with previous work, when expected value is  
394 equal, the data show that participants prefer choices in which unrewarded trials are attributed to  
395 errors in movement execution rather than errors in action selection (Parvin et al., 2018; Green et  
396 al., 2010; Wu et al., 2009).

397 We then examined the effect of the different outcomes on the subsequent choice, asking  
398 how they influenced switching behavior (**Figure 2A**). Participants exhibited high switching rates  
399 overall (54%), but the rate differed according to outcome type ( $F [2, 56] = 10.23, p < .001, \eta^2_g =$   
400  $.11$ ). Switching was highest following selection errors (M = 66%; SE = 5%) and markedly lower  
401 following execution errors (M = 42%, SE = 5%;  $t(28) = 5.22, p < .001$ ). This difference is consistent  
402 with the hypothesis that motor errors attenuate value updating, perhaps because participants  
403 believe they have more control to correct for execution errors (Parvin et al., 2018).

404 Interestingly, switch rates following rewarded trials fell between the other two outcome  
405 types (M = 55%, SE = 6%). There was no difference between switch rates following reward relative  
406 to selection errors ( $t(28) = 1.85, p = .227$ ) or execution errors, although the latter approached  
407 significance ( $t(28) = 2.46, p = .062$ , following Bonferroni correction). The fact that many participants  
408 (18 of 29) were so prone to switching after a rewarded outcome and even more so (numerically)  
409 than after an execution error was unexpected. The high switching rates would suggest a bias  
410 towards exploratory behavior in this task- which might have been promoted by the relatively low  
411 rewards and/or the highly probabilistic nature of the outcomes (Cohen et al., 2007; Daw et al.,  
412 2006). Notably, there were very large individual differences in the treatment of the outcomes:  
413 Switch rates ranged from 3% to 98% following rewards, 7%-99% following selection errors and  
414 4%-81% following execution errors.

415

### 416 ERP Responses

417 Our primary aim was to examine whether selection and execution errors could be reliably  
418 distinguished in outcome-locked ERPs. To start, we ran an exploratory 3 (Bandit Type: High  
419 Execution/Low Selection Error vs. Low Execution/High Selection Error vs. Neutral) X 3 (Outcome:  
420 Reward vs. Selection Error vs. Execution Error) ANOVA at each time point for the frontocentral and  
421 parietal clusters. The main effect of Bandit Type was not significant ( $p$ 's  $\geq .702$ ) and there was no  
422 Bandit Type X Outcome interaction ( $p$ 's  $\geq .671$ ). Thus, we collapsed across the three bandits in

423 our primary analyses of the three outcomes, allowing us to avoid increasing the family-wise error  
424 rate.

425 The grand averaged ERPs related to each outcome are shown in **Figure 2B and 2C**. F  
426 tests revealed two significant clusters in the frontocentral region between 156 -180 ms and 210-  
427 336 ms, and three clusters in the parietal region (176-196 ms; 218-239 ms; and 355-438 ms).  
428 Descriptively, the first cluster in the frontocentral region was driven by a delay in the onset of an  
429 initial P200-like signal following an execution error, and the second cluster incorporated  
430 FRN/RewP deflections following selection and execution errors, along with subsequent positive  
431 deflections, likely reflecting the P3a subcomponent of the P300 signal (Polich, 2007). The early two  
432 clusters in the parietal region reflect shifts in the latency and amplitude of the execution error ERP,  
433 with the third cluster driven by the attenuation of the P3b subcomponent of the P300 following  
434 selection errors.

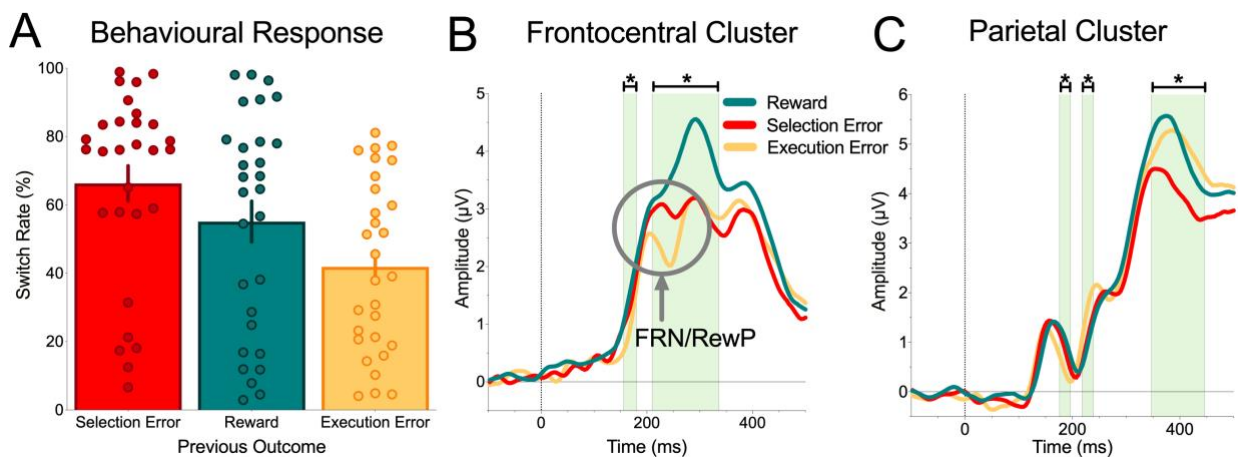

435

436 **Figure 2- Behavioral Responses and ERP Grand Averages.** (A) Switching rates following the three  
437 trial outcomes. Participants were more likely to repeat a choice (indexed by lower switch rates)  
438 following execution errors relative to selection error feedback. Error bars represent  $\pm 1$  SEM. Feedback-  
439 locked ERPs for each outcome type, recorded from (B) frontocentral and (C) parietal electrode clusters.  
440 Zero on the abscissa indicates feedback onset. The green shaded regions indicate the significant  
441 clusters identified in the mass univariate analysis. Pairwise differences in these clusters are visualized  
442 in Figures 3-5 through the comparison of difference waveforms.

443

444 **Figure 3A** depicts the Selection Error difference waveform, derived by subtracting the  
445 Selection Error waveform from Reward ERPs for the frontocentral cluster (shown in **Figure 2B**)  
446 and shows a statistically significant cluster of time points between 242-336 ms (one-sample t-tests  
447 of the difference wave against zero). An examination of the scalp topography of the first (242-289  
448 ms) and second half of this window (289- 336 ms) indicated a clear frontocentral maximum in the  
449 early phase, followed by a shift towards centroparietal maximum in the later part of the window  
450 (**Figure 3B**).

451 In line with the reinforcement learning account of the FRN/RewP, there was a relationship  
452 between neural activity and behavior. Specifically, amplitude (mean:  $r_s = -.483$ ,  $p = .009$ ; peak:  $r_s =$   
453  $-0.36$ ,  $p = .052$ ; **Figure 3C**) from the early part of the cluster (capturing the FRN/RewP) negatively

454 correlated with behavioral adjustment: The larger the difference waveform (i.e., greater negative  
455 deflection for selection errors relative to rewards), the greater the bias for the participant to switch  
456 to a different bandit following a selection error outcome relative to a reward outcome. We note that  
457 one participant had a switch rate score of -0.87, which was 2.97 standard deviations away from the  
458 mean. Re-running the analysis without this participant showed a weaker relationship, but the  
459 pattern remained statistically significant (mean:  $r_s = -.39$ ,  $p = .042$ ; peak:  $r_s = -.34$ ,  $p = .074$ ).

460 The topographical map (**Figure 3C** inset) demonstrates that this effect was localized to the  
461 frontocentral region. We found no evidence for such a relationship in the later, P3a, part of the time  
462 window ( $r_s = -.08$ ,  $p = .672$ ; **Figure 3D**). The mean FRN/RewP and P3a correlations were  
463 marginally different from one another ( $z = 1.96$ ,  $p = .05$ ), providing support that the FRN/RewP, but  
464 not the P3a, is a reliable correlate of behavior change.



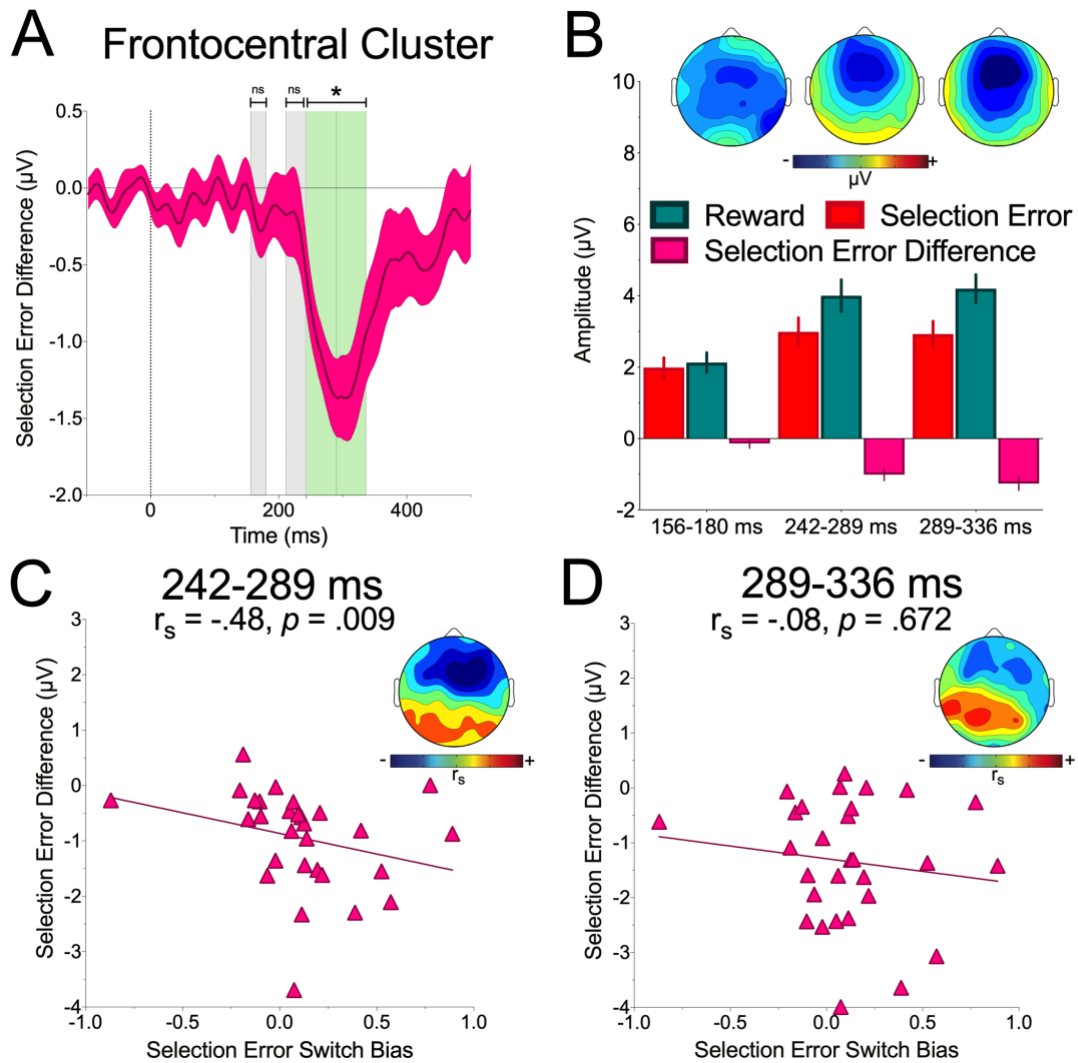

465

466 **Figure 3- Selection Error in the Frontocentral Cluster:** (A) The Selection Error waveform, defined as  
 467 the difference in the ERPs on trials resulting in selection errors and rewards. The green shaded regions  
 468 indicate significant clusters for this contrast and the grey shaded regions indicate where the clusters  
 469 identified in the original time-series analysis did not reach statistical significance for this difference  
 470 waveform. Zero on the abscissa indicates feedback onset. (B) Mean amplitudes for the early and late  
 471 phases of the statistically significant clusters, with insets showing scalp maps of the distribution of  
 472 differences across sites for each time interval. Selection Error difference waveform amplitude (shown  
 473 on the ordinate, where negative values indicate more negative amplitude for selection errors relative to  
 474 reward) correlated with an increase in the Switch Bias score (shown on the abscissa, where positive  
 475 values indicate more switching following selection errors relative to reward) at a time interval  
 476 corresponding to the FRN/RewP (C), but not the P3 (D). The insets show scalp maps of the distribution  
 477 of amplitude differences across sites, revealing a frontocentral maxima for the FRN/RewP correlation.

478

479 Execution Errors

480 To examine the electrophysiological correlates associated with unrewarded outcomes  
 481 attributed to motor execution errors, we performed similar analyses, but now focus on the  
 482 comparison between execution error trials and reward trials (the Execution Error difference  
 483 waveform- the result of subtracting the Execution Error ERP from Reward ERPs in the

484 frontocentral cluster shown in **Figure 2B**). This comparison revealed two statistically significant  
485 clusters- one ranging from 156-180 ms and a second between 207-325 ms (**Figure 4A**).

486 The first cluster showed an amplitude reduction in response to Execution Errors relative to  
487 reward trials. Similar to the Selection Error waveform result, we expected the second cluster would  
488 be contaminated by a P3a signal. Thus, we followed the same protocol, splitting this cluster into  
489 two equal intervals – (i) an early phase marked by the time interval 207-266 ms; and (ii) a later  
490 phase for activity between 266-325 ms. There was a clear frontocentral distribution for the early  
491 phase, and in the later time window, a shift towards centroparietal electrodes (**Figure 4B**).

492 We next examined the relationship between these three epochs (156-180 ms; 207-266 ms;  
493 266-325 ms) and behavioral adjustment (**Figure 4C-E**). The peak amplitude difference in the  
494 earliest interval (156-180 ms) correlated positively ( $r_s = 0.37$ ,  $p = .05$ ) with switching rates following  
495 an execution error relative to reward. Following execution errors, smaller peaks in the 156-180 ms  
496 time window were associated with a lower tendency to switch. Note that this pattern is opposite to  
497 that observed between the amplitude of the FRN/RewP and behavioral adjustments following  
498 selection errors. The mean amplitude measure had a similar pattern of results, but was not  
499 significant ( $r_s = 0.35$ ,  $p = .065$ ). An examination of topography revealed this correlation to be  
500 maximal in the frontocentral cluster, suggesting that smaller amplitudes in response to execution  
501 errors early in the feedback processing stream are associated with a higher tolerance to this  
502 outcome.

503 In contrast to the results for Selection Errors, the FRN/RewP captured in the 207-266 ms  
504 time window did not correlate with behavioral adjustment ( $r_s = .07$ ,  $p = .722$ ). We tested, and  
505 confirmed, that this correlation was reliably different to the correlation observed for Selection Errors  
506 in the FRN/RewP time interval ( $z = 2.40$ ,  $p = .016$ ). There was no correlation between the  
507 Execution Error waveform in the P3a time window (266-325 ms) and behavioral adjustment ( $r_s =$   
508  $.22$ ,  $p = .258$ ).

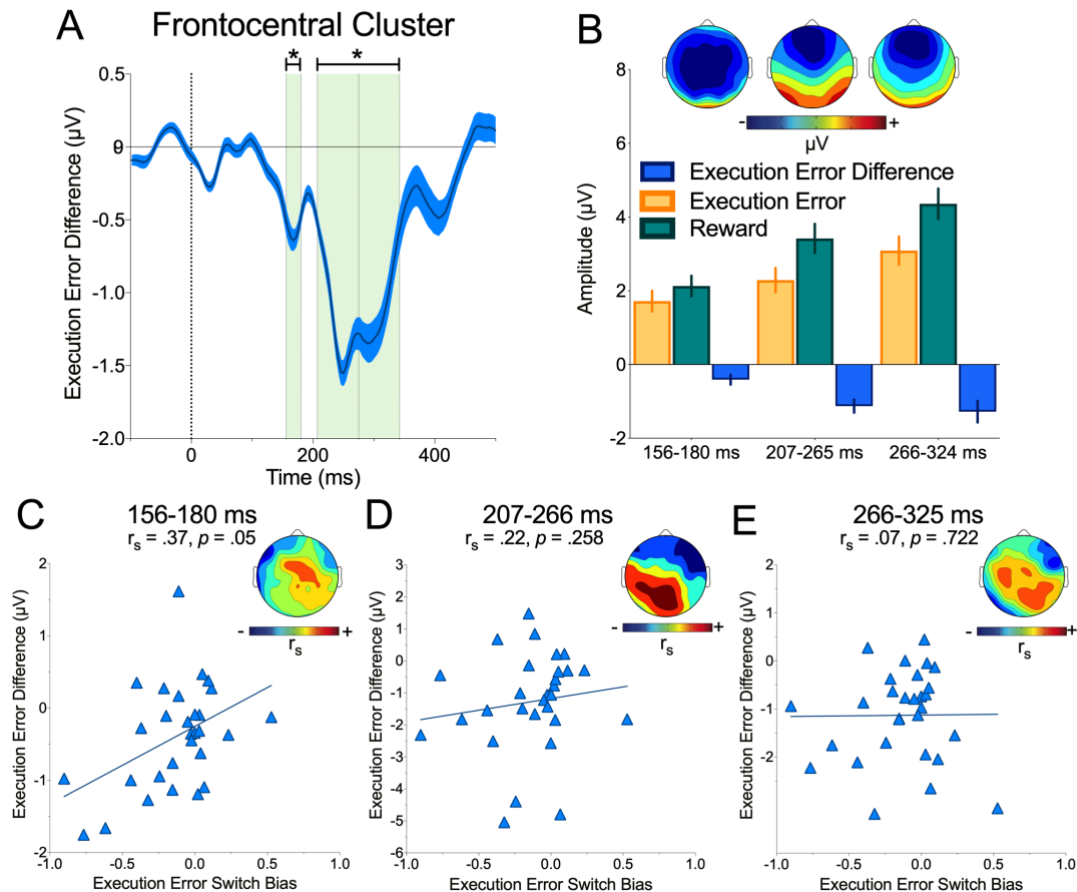

509

510 **Figure 4- Execution Error in the Frontocentral Cluster:** (A) The Execution Error difference  
 511 waveform, defined as the difference amplitude for execution error and reward ERPs. The green shaded  
 512 regions indicate clusters showing statistically significant differences. Zero on the abscissa indicates  
 513 feedback onset. (B) Mean amplitudes for the early and late phases of the significant clusters. (C) The  
 514 Execution Error difference waveform amplitude (shown on the ordinate, where positive values indicate  
 515 larger amplitude for execution errors relative to reward) positively correlated with an increase in the  
 516 Switch Bias score (shown on the abscissa, where positive values indicate more switching following  
 517 execution errors relative to reward) in this early time window, but there were no correlations in the later  
 518 time windows (D & E).

519

520 We conducted the same analysis for the Execution Error waveform in the parietal cluster of  
 521 electrodes. Execution errors elicited smaller amplitude responses relative to rewards in an early  
 522 time window (176-196 ms) but elicited larger amplitude responses at 218-239 ms post feedback. In  
 523 the later time window, there was a positive correlation between amplitude and behavior ( $r_s = .47, p$   
 524  $= .01$ ) in the posterior region, suggesting a shift from frontocentral to parietal regions in the  
 525 processes driving behavioral adjustment (Dhar & Pourtois, 2011; Overbeek et al., 2005).  
 526 Interestingly, and unexpectedly, the amplitude of the P3b subcomponent of the P300 signal—  
 527 proposed to reflect the revision of internal forward models in posterior parietal cortex (Krigolson &  
 528 Holroyd, 2007a) showed no difference in the processing execution errors and rewards (see **Figure**  
 529 **2C**) and there was no relationship with behavioral adjustment ( $r_s = -0.01, p = .946$ ).

## 530 Error Sensitivity Difference Waveform

531 As described in the previous two sections, when using a common baseline (rewarded  
532 trials), we observed differences in both the ERP results and correlational analysis between  
533 unrewarded trials that were attributed to failures in movement execution or action selection. We  
534 performed a direct comparison between these two types of unrewarded outcomes by analyzing an  
535 Error Sensitivity difference waveform, subtracting the ERP for selection errors from the ERP for  
536 execution errors (see **Figure 2B** for the parent waveforms).

537 In the frontocentral cluster there was a significant difference in the range of the FRN/RewP  
538 (222-250 ms; **Figure 5 A, B**). We had anticipated that the amplitude of the FRN/RewP would be  
539 attenuated following execution errors, assuming a lower response would be reflective of reduced  
540 value updating (McDougle et al., 2019). However, the observed effect was in the opposite  
541 direction: Execution errors elicited a larger FRN/RewP deflection, relative to selection errors.

542 We also examined whether the magnitude of this difference correlated with the “Switch  
543 Bias” rate. For this measure, the proportion of switches following execution errors was subtracted  
544 from the number of switches made following selection errors. Note that these values range from 0  
545 to -0.91, due to the fact no participants produced more switches following execution errors relative  
546 to selection errors. Although the parent waveforms for this correlation are included in the previous  
547 analyses, the EEG activity in this analysis is specific to the range 220-250 ms, the window in which  
548 the error outcome ERPs differed significantly.

549 There was no relationship between mean amplitude in this window and Switch Bias ( $r_s =$   
550  $.23$ ,  $p = .23$ ). However, the peak negative amplitude revealed a positive correlation with Switch  
551 Bias ( $r_s = .41$ ,  $p = .026$ ; **Figure 5C**). Participants who had relatively similar switching rates to the  
552 two unrewarded outcomes had smaller FRN/RewP differences, while individuals with a large  
553 negative bias (i.e., less switching after execution errors) also exhibited larger FRN/RewP  
554 amplitudes for motor execution errors relative to selection errors. This correlation was maximal in  
555 frontocentral sites (**Figure 5C inset**).

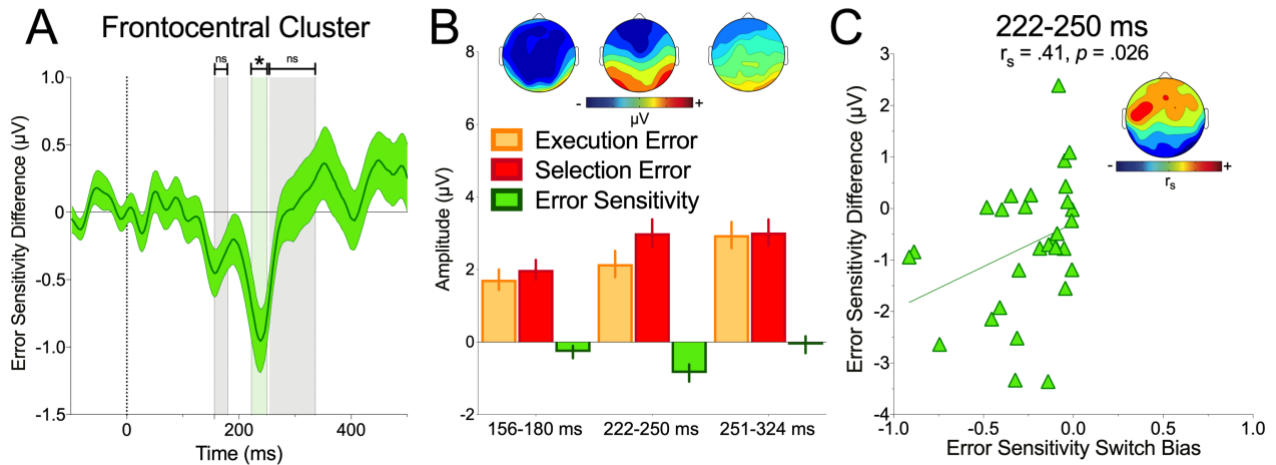

556

557 **Figure 5- Error Processing Differences in the Frontocentral Cluster:** (A) The Error Sensitivity  
558 difference waveform, calculated by subtracting ERPs for selection error from execution error ERPs. The  
559 green shaded region indicates the single cluster in which there was a significant difference for this  
560 contrast and the grey shaded regions indicate where the clusters identified in the original time-series  
561 analysis did not reach statistical significance in this comparison. Zero on the abscissa indicates  
562 feedback onset. (B) Mean amplitudes for the early and late clusters indicated by shaded regions in  
563 panel A. Inset scalp maps show topographical distribution for each cluster. (C) Peak amplitude  
564 difference in the FRN/RewP (shown on the ordinate, where negative values indicate a larger negative  
565 deflection for execution errors relative to selection error) correlated with a larger Switch Bias score  
566 (shown on the abscissa, where larger negative values indicate more switching following selection error  
567 relative to execution error). Note that no participants showed higher rates of switching following  
568 execution error relative to selection error. This correlation shows that as the similarity in the behavioral  
569 response to execution and selection error increased, amplitude differences in the processing of  
570 execution and selection error decreased.

571

572 Examining the parietal cluster revealed no differences in the earliest interval (176-196 ms).  
573 However, differences emerged in the 218-239 ms and 359-445 ms epochs, with larger positive  
574 amplitudes for execution errors relative to selection errors. The mean amplitude across each of  
575 these clusters (218-239 ms and 359-445 ms) was not correlated with the behavioral adjustment  
576 scores ( $r_s \leq .179$ ,  $p$ 's  $\geq .352$ ).

## 577 Kinematic Analysis

578 To gain a deeper understanding of the relationship between brain activity and task  
579 performance, we examined correlations between task kinematics and the statistically significant  
580 periods identified in the time series analysis in the frontocentral and parietal difference waveforms.  
581 We reasoned that, in contrast to Selection Errors, where there was a relationship between  
582 FRN/RewP amplitude and choice selection, the Execution Error FRN/RewP may instead be  
583 encoding information about cursor position and subsequent movement correction.

584 In the first analysis, we examined whether there was a relationship between cursor error  
585 magnitude and ERP activity. As expected from the task manipulation, the kinematic data revealed  
586 a significant difference in mean absolute end-point cursor error as a function of Outcome ( $F(2, 56)$   
587  $= 8209, p < .001, \eta^2_g > .99$ ). There were no differences ( $t(28) = 1.26, p = .655$ ) between Rewards  
588 ( $M = 1.37^\circ, SE = 0.01^\circ$ ) and Selection Errors ( $M = 1.4^\circ, SE = 0.01^\circ$ ), both of which presented the  
589 cursor within the boundaries of the target, but Execution Errors ( $M = 5.87^\circ, SE = 0.22^\circ$ ) elicited  
590 more error relative Selection Error ( $t(28) = 91.68, p < .001$ ) and Reward ( $t(28) = 99.57, p < .001$ ).  
591 Despite this, there were no statistically significant correlations between the mean activity of the  
592 statistically significant clusters in the difference waveforms and corresponding differences in cursor  
593 error magnitude (Selection Error Difference Waveforms:  $r_s \leq 0.176, p's \geq .359$ ; Execution Error  
594 Difference Waveforms:  $r_s \leq 0.228, p's \geq 0.233$ ; Error Difference waveform:  $r_s \leq 0.152, p's \geq .429$ ).

595 In the second analysis, we asked whether ERP amplitude on the current trial would  
596 correlate with the degree of change in cursor position on subsequent trials. Here, we restricted  
597 analysis to the subset of trials in which participants chose the same target consecutively. The  
598 amount of motor correction in response to feedback (computed as the mean absolute change in  
599 end-point position relative to the cursor position on the previous trial), varied as a function of  
600 Feedback ( $F(2, 56) = 75.37, p < .001, \eta^2_g = .66$ ). As both outcomes indicated a successful  
601 movement, we expected, and found, no difference ( $t(28) = 0.47, p > .999$ ) in the subsequent  
602 degree of correction for Selection Error ( $M = 3.73^\circ, SE = 0.15^\circ$ ) and Reward ( $M = 3.64^\circ, SE =$   
603  $0.17^\circ$ ) trials. In contrast, Execution Error, signaling a need to change one's motor response to hit  
604 the target ( $M = 6.53^\circ, SE = 0.22^\circ$ ) had higher rates of correction relative to both Selection Error  
605 ( $t(28) = 8.95, p < .001$ ) and Reward ( $t(28) = 8.95, p < .001$ ) outcomes. Despite these behavioral  
606 differences, there were no correlations between mean activity of the statistically significant clusters  
607 in the difference waveforms and the magnitude of subsequent corrections (Execution Error:  $r_s \leq -$   
608  $0.239, p's \geq 0.211$ ; Selection Error:  $r_s \leq -0.328, p's \geq 0.083$ ; Error Sensitivity:  $r_s \leq .152; p's \geq 0.429$ ).

609 To ensure that we did not miss any potential sensitivity to task kinematics in other time  
610 ranges, we undertook an exploratory search of the full time series data by correlating cursor error  
611 and motor correction with mean amplitude from 150ms to 500ms.

612 We found no correlations between ERP difference waveforms and Cursor Error in the  
613 frontal ( $p$ 's  $\geq .45$ ) or parietal sites ( $p$ 's  $\geq .75$ ) following correction. We also note, with a degree of  
614 caution given the corrected  $p$  values were not significant, that there was one statistically significant  
615 pattern prior to correction- a positive correlation between the Error Sensitivity difference waveform  
616 and Cursor Error ( $r_s = .43$ , 406 ms). In correlating motor correction rates with ERP amplitude, we  
617 found no significant relationships in the frontocentral cluster ( $p$ 's  $\geq .454$ ). Here, we noted that the  
618 strongest relationship ( $r_s = .456$ ) was a positive one between motor correction and the Error  
619 Sensitivity difference waveform at 164 ms – a pattern that was sustained across 156- 174 ms. As  
620 participants made larger degrees of correction following Execution Errors relative to Selection  
621 Errors, they also exhibited greater amplitude. In the parietal cluster, we found no reliable patterns  
622 of activity following ( $p$ 's  $\geq .97$ ) or prior to correction ( $p$ 's  $\geq .1$ ).

### 623 **Perturbation Awareness**

624 In a final set of explorations, we examined whether participants were sensitive to the  
625 feedback manipulation that had been applied to control the frequency of our three outcomes. In  
626 almost half the trials ( $M = 47.8\%$ ,  $SE = 0.01\%$ ) we delivered perturbed instead of veridical  
627 feedback (52.2%,  $SE = 0.01\%$ ). We had taken measures to minimize the likelihood of participants  
628 becoming aware of these changes (e.g., no online movement feedback was provided, and end-point  
629 feedback was presented 1 s after the stylus had passed the bandit) and in a post-experiment  
630 survey, participants indicated that they believed execution error outcomes to be the result of poor  
631 reaches, suggesting no explicit awareness of the manipulation. Nevertheless, we did find  
632 differences in cursor error (**Figure 6A**), as revealed through a 3 (Outcome: Reward vs. Selection  
633 Error vs. Execution Error) X 2 (Veracity: Veridical vs. Perturbed) interaction ( $F(2, 56) = 27.4$ ,  $p <$   
634  $.001$ ,  $\eta^2_g = .25$ ). In all cases, Veridical cursor error was largest in the Perturbed trials, but the effect  
635 was greatest for Reward (Veridical  $M = 1.68^\circ$ ,  $SE = 0.02^\circ$ , Perturbed  $M = 0.98^\circ$ ,  $SE = 0.01^\circ$ ;  $t(28) =$   
636  $26.83$ ,  $p < .001$ ) and Selection Error (Veridical  $M = 1.72^\circ$ ,  $SE = 0.02^\circ$ , Perturbed  $M = 0.97^\circ$ ,  $SE =$   
637  $0.02^\circ$ ;  $t(28) = 30.95$ ,  $p < .001$ ) outcomes, with differences of  $0.7^\circ$  and  $0.75^\circ$  respectively. For  
638 Execution Error, there was a visual difference of  $0.27^\circ$  (Veridical  $5.99^\circ$ ,  $SE = 0.07^\circ$ , Perturbed  $M =$   
639  $5.72^\circ$ ,  $SE = 0.04^\circ$ ;  $t(28) = 3.5$ ,  $p = .045$ ).

640 Participants did not alter their behavioral strategy in response to feedback perturbations  
641 (Veracity:  $F(1, 28) = 0.899$ ,  $p = .351$ ,  $\eta^2_g < .01$ ); Veracity X Outcome:  $F(2, 56) = 1.42$ ,  $p = .251$ ,  
642  $\eta^2_g < .01$ ; **Figure 6B**). However, a suggestion that they might have been implicitly sensitive to  
643 these differences is indicated by the degree of motor correction following veridical and perturbed  
644 feedback (**Figure 6C**). One participant had no stay trials following perturbed feedback in this  
645 subset of data and was excluded from this analysis. In the remaining participants, we observed an  
646 Outcome X Veracity interaction ( $F(2, 54) = 4.49$ ,  $p = .016$ ,  $\eta^2_g = .04$ ). There were no differences in  
647 the degree of motor correction following Execution Error (Veridical  $M = 6.3^\circ$ ,  $SE = 0.19^\circ$ , Perturbed  
648  $M = 6.84^\circ$ ,  $SE = 0.32^\circ$ ;  $t(27) = 2.07$ ,  $p = .718$ ), but greater corrections (Reward: Veridical  $M = 2.92^\circ$ ,  
649  $SE = 0.13^\circ$ , Perturbed  $M = 4.28^\circ$ ,  $SE = 0.26^\circ$ ;  $t(27) = 4.56$ ,  $p < .001$ ; Selection Error: Veridical  $M =$   
650  $3.02^\circ$ ,  $SE = 0.20^\circ$ , Perturbed  $M = 4.62^\circ$ ,  $SE = 0.17^\circ$ ;  $t(27) = 6.30$ ,  $p < .001$ ) followed false hits trials.  
651 These positively surprising outcomes (real reaches had missed the target on these trials, hence  
652 the perturbation) may have prompted overcompensation as participants sought to calibrate their  
653 movements to task feedback.

654 Given these differences, we explored the extent to which the ERP signal was sensitive to  
655 the veracity of the feedback. We re-ran the ERP time-series analysis, performing a 3 (Outcome:  
656 Reward vs. Selection Error vs. Execution Error) X 2 (Veracity: Veridical vs. Perturbed) at each time  
657 point for the frontocentral and parietal clusters. There were no statistically significant main effects  
658 of Veracity ( $F$ 's  $\leq 6.99$ ,  $p$ 's  $\geq .397$ ) and no Outcome X Veracity interactions ( $F$ 's  $\leq 2.55$ ,  $p$ 's  $\geq .79$ ) in  
659 the frontocentral cluster and similarly, no main effects ( $F$ 's  $\leq 5.42$ ,  $p$ 's  $\geq .853$ ) or Veracity X  
660 Outcome interactions ( $F$ 's  $\leq 1.83$ ,  $p$ 's  $\geq .986$ ) in the parietal cluster.

661 We then explored whether there were any differences in the relationship between ERP  
662 activity and kinematic adjustment as a function of Feedback Veracity. As perturbed feedback  
663 elicited larger corrective movements than veridical, we speculated that an ERP signal sensitive to  
664 positive surprise may scale in response to this behavior for Selection and Execution error trials. To  
665 explore this idea, a difference wave subtracting perturbed ERP amplitude from veridical was  
666 computed. The amplitude of this "Perturbation Difference" waveform was correlated with (i) the  
667 mean difference in cursor error for veridical and perturbed feedback per outcome; and (ii) the mean  
668 difference in degree of correction following veridical relative to perturbed feedback per outcome.



669 In analysing the relationship between the Perturbation Difference waveform and Cursor  
670 Error in the frontocentral cluster, we found no correlations that survived correction for multiple  
671 comparisons ( $p$ 's  $\geq .616$ ). However, in the parietal cluster, the Selection Error waveform strongly  
672 correlated with Perturbation Difference amplitude at 273 ms ( $r_s = -0.62$ ,  $p = .011$ ; **Figure 6D**),  
673 indicating a sensitivity to discrepancies between actual and presented hand position. Specifically,  
674 this correlation shows that for participants with larger veridical errors, perturbed feedback elicited  
675 larger positive amplitudes in a manner consistent with the P300 signaling surprise (Donchin, 1981;  
676 Nassar et al., 2019). The Error Sensitivity difference waveform showed a similar pattern but did not  
677 reach the significance threshold after correction ( $r_s = -.47$  at 343 ms). The pattern for Execution  
678 Error was reversed, with the strongest correlation observed later ( $r_s = .45$  at 492 ms)- with  
679 amplitude highest when both cursor error and amplitude were higher in the veridical condition  
680 relative to the perturbed condition. However, this too was not significant following correction.

681 Finally, in terms of the relationship between perturbation amplitude differences and the  
682 degree of motor correction, there were no significant effects in the frontocentral ( $p$ 's  $\geq .120$ ) or  
683 parietal clusters ( $p$ 's  $\geq .82$ ). With the same note of caution for non-significant correlations offered  
684 above, two patterns suggest a further dissociation in the processing of selection and execution  
685 error: In the time frame of the FRN/RewP, there was a relationship between frontocentral  
686 amplitude of the Perturbation Difference waveform and motor correction ( $r_s = -.542$  at 289 ms).  
687 Here, greater corrective movements in response to perturbed feedback correlated with larger  
688 differences in the FRN/RewP; and (ii) later in the window, the Perturbation Difference waveform for  
689 Execution Errors positively correlated ( $r_s = .52$  at 335 ms) with the degree of motor correction,  
690 indicating that larger cursor error corrections in response to perturbed feedback have  
691 correspondingly larger amplitudes for perturbed feedback in the time range of the P3a. Despite the  
692 finding that Selection Error, like Reward, resulted in adaptation following perturbed relative to  
693 veridical outcomes, no relationship was observed, with the strongest effect at 420 ms ( $r_s = -.299$ ).

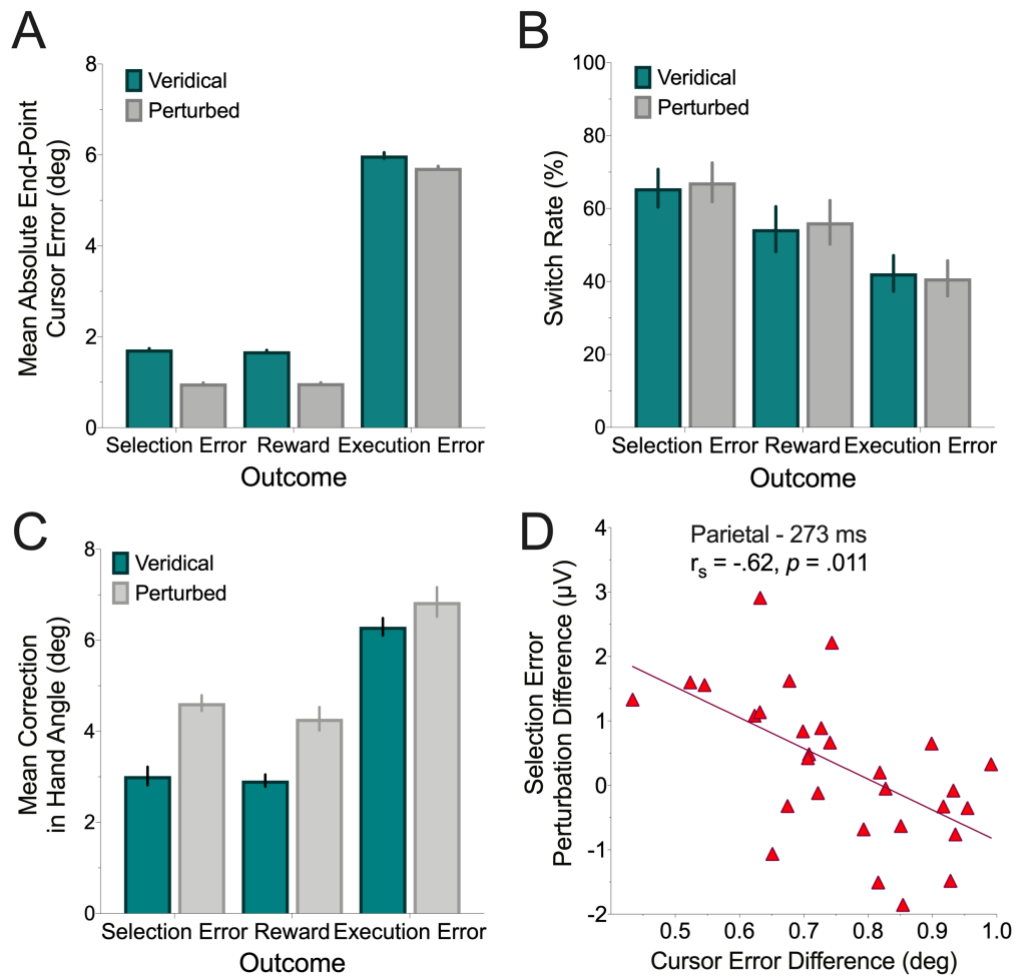

694

695 **Figure 6- Feedback Perturbation and Awareness:** (A) Cursor error was larger for veridical  
696 feedback relative to perturbed; (B) Despite smaller cursor error, participants made larger  
697 corrections in response to perturbed feedback, with the pattern most pronounced for false hits; (C)  
698 Perturbed feedback did not impact on the likelihood of switching bandits; (D) Amplitude differences  
699 between perturbed and veridical feedback in the Parietal cluster for Selection Errors at 273 ms  
700 (shown on the ordinate, where positive values indicate larger amplitude for veridical relative to  
701 perturbed outcomes) correlated with magnitude of the difference in cursor error for these outcomes  
702 (shown on the abscissa, where positive values indicate larger veridical cursor errors relative to  
703 perturbed).

## 704 **Discussion**

705 Adaptive behavior necessitates distinguishing between outcomes that fail to produce an  
706 expected reward due to either the selection of the wrong action plan or poor motor execution.  
707 Although the majority of decision-making research, in neuroscience as well as economics, have  
708 focused almost exclusively on the former, a few studies have shown that failed outcomes attributed  
709 to sensorimotor errors can markedly biases choice behavior (Green et al., 2010; McDougale et al.,  
710 2016, 2019). Here, we examined this issue by asking how an ERP signature of reinforcement  
711 learning, the Feedback-Related Negativity/Reward Positivity (FRN/RewP), varied in response to  
712 selection and motor errors. Predicated on the theory that the FRN/RewP is a scalp-related  
713 prediction error (Holroyd & Coles, 2002), we tested the hypothesis that errors attributed to failures  
714 in execution should lead to an attenuation in the FRN/RewP.

715 Consistent with our expectations, selection errors elicited a larger FRN/RewP relative to  
716 reward outcomes. Moreover, in line with a reinforcement learning account, the amplitude of the  
717 FRN/RewP following selection errors was negatively correlated with the probability that participants  
718 switched between the response options following feedback. Behaviorally, participants showed  
719 lower switch rates following execution errors, a pattern consistent with the hypothesis that the  
720 reinforcement learning system discounts these errors (McDougale et al., 2019). However, contrary  
721 to the prediction that FRN/RewP amplitude would be attenuated following execution errors, these  
722 errors actually produced the largest FRN/RewP. A striking difference between the ERPs in  
723 response to selection and execution error was that the amplitude of the FRN/RewP following  
724 selection errors was predictive of behavioral biases and learning, whereas this ERP response  
725 following execution errors did not correlate with these variables.

726 While almost all participants were more likely to switch after a selection error compared to  
727 an execution error, the differential response to these two error outcomes varied considerably  
728 across participants. Moreover, this behavioral difference was correlated with the neural response  
729 to the two types of feedback: The more similarly participants treated the two outcomes at a  
730 behavioral level, the smaller the difference in FRN/RewP amplitude in response to these  
731 outcomes.

732 These findings could be reconciled by considering the top-down mechanisms that may  
733 modulate how execution errors are processed. Behavioral experiments have shown that a sense of  
734 agency related to the perceived ability to correct for motor errors biases choice behavior (Parvin et  
735 al., 2018). In the present experiment, the finding that participants persevered with a bandit  
736 following execution error but switched more often following selection errors also points towards  
737 differences in agency. Previous work on the FRN/RewP has shown that outcomes that can be  
738 controlled lead to a more negative FRN/RewP than those that cannot (Sidarus et al., 2017) and the  
739 FRN/RewP is attenuated in the absence of actively performed actions (Donkers et al., 2005;  
740 Donkers & van Boxtel, 2005). The finding that execution errors produced a larger FRN/RewP  
741 relative to selection error is consistent with the presumed greater sense of agency associated with

742 this type of unrewarded outcome.

743 A recent fMRI experiment using a 3-arm bandit task similar to that employed here, revealed  
744 an attenuation of the signal associated with negative reward prediction error in the striatum  
745 following execution failures (McDougle et al., 2019). Our observation of a larger negative deflection  
746 for execution error trials in the FRN/RewP may appear contrary to these previously reported striatal  
747 results. However, the fMRI investigation did show increased ACC activity in response to execution  
748 errors compared to selection errors, suggesting that the former have their own neural signature.  
749 With regards to the EEG response, there have been a number of studies reporting FRN/RewP  
750 deflections in response to execution error (Anguera et al., 2009; Krigolson et al., 2008; Torrecillos  
751 et al., 2014). These studies, in line with the Prediction-Response Outcome model of medial frontal  
752 cortex function (Alexander & Brown, 2011), point to the existence of a general monitoring system  
753 that responds to violation of expectations. However, an important aspect of these tasks is that  
754 errors in movement execution typically resulted in high level goal errors (e.g., failure to reach or  
755 remain on target in a manual tracking task) and/or involved the introductions of perturbations  
756 during the movement phase (Krigolson et al., 2008). This makes it difficult to rule out the  
757 contribution of cognitive control and response inhibition processes- which are known to generate  
758 an N200 component that shares similar spatial and temporal characteristics to the FRN/RewP  
759 signal (Holroyd, 2004; Holroyd et al., 2008). A recent study separating reward and sensory  
760 prediction errors in a motor adaptation task showed that the FRN/RewP responds to the former,  
761 but not the latter (Palidis et al., 2019). The present findings, indicating qualitatively different  
762 relationships between the two medial frontal negativities with behavioral modification, add weight to  
763 the possibility that execution error processing may be distinct from dopamine-related reinforcement  
764 learning processes.

765 We also observed two distinct patterns of activity in time windows preceding and following  
766 the FRN/RewP that provide further support for the claim of differential processing of execution and  
767 selection error. First, smaller amplitude responses were observed following execution errors  
768 relative to rewards in frontocentral sites 156-180 ms post-feedback, and the amplitude of this  
769 component correlated with switch rates. Second, in parietal sites (218-239 ms), larger amplitude  
770 responses occurred following execution errors relative to reward and this difference was also  
771 correlated with switch rates. Importantly, in a reversal of the FRN/RewP pattern, magnitude  
772 differences in these early frontal and late parietal signals correlated with behavioral adjustment  
773 linked to execution errors. This pattern points towards the existence of distinct error monitoring  
774 systems operating at different levels of behavioural control (Yordanova et al., 2004).

775 Exploratory analysis on the relationship between ERP amplitude and task showed that the  
776 degree of motor correction following execution errors relative to selection errors correlated with  
777 amplitude differences in an early frontal cluster (156-174 ms). The time course of this cluster  
778 closely mirrored that of the earliest difference between execution error and reward – where  
779 amplitude differences correlated with switch rates. Given that we had no a priori expectations for

780 such a result and that this specific result did not survive correction for multiple comparisons,  
781 interpretations must be treated with caution and require further robustly powered replication work  
782 to confirm. Should future work replicate this pattern it would add weight to the idea that the need to  
783 make a behavioural modification following an error in the motor system precedes the generation of  
784 the FRN/RewP.

785 A pertinent question of the present task and data is the extent to which participants were  
786 aware of the perturbations applied to the feedback to control outcome frequencies. Participants did  
787 not have access to online feedback and end-point cursor information was presented with a 1  
788 second delay to minimize the likelihood of participants becoming aware of the perturbations. In a  
789 post-experiment survey, participants indicated that they had attributed execution errors to poor  
790 motor control. Consistent with this we found that during the task, perturbed feedback did not alter  
791 choice strategy, nor did it result in any significant differences in the ERP. However, participants did  
792 make larger corrective movements following perturbed feedback- this was despite these outcomes  
793 showing smaller cursor errors than veridical feedback. In an exploratory search we also found a  
794 correlation between the degree of cursor error in veridical and perturbed outcomes and amplitude  
795 differences at 273 ms, likely reflecting the onset of the P300. Here, amplification of the signal  
796 following perturbed feedback reduced as the amount of veridical error increased. That the P300  
797 shows a sensitivity to discrepancies between actual and presented hand position is consistent with  
798 the theory that the signal is generated through the active updating of an internal model of the  
799 environment (Donchin & Coles, 1988). The P300 is also notable for being a putative marker of  
800 conscious perception (Rutiku et al., 2015). If participants did indeed have access to this information  
801 during the task, it may be that these perturbations were not sufficiently large enough to signal a  
802 need to change strategy.

803 These findings also raise a broader question of whether the present results might be  
804 specific to outcomes that are framed as execution errors, or extend to any endogenous or  
805 exogenous event that results in an unrewarded trial in which the outcome does not provide  
806 information about the reward probability associated with the selected object (Green et al., 2010).  
807 For example, if an unexpected gust of wind blew a tennis lob out-of-bounds, would that be treated  
808 as an “execution error”? Or, if after pulling the lever on a slot machine, a power failure caused the  
809 game to terminate without a payoff, would this affect how the choice is judged? A future study  
810 could test endogenous execution errors (e.g., reaching error) and exogenous errors (e.g., the task  
811 screen goes blank randomly before an outcome is delivered) more explicitly than the perturbations  
812 applied here. If similar results are found in both settings, elements of the early activity observed in  
813 frontocentral sites may indicate the establishment of a sensory “state”, representing that the  
814 intended action plan was not properly implemented, irrespective of whether this mismatch was due  
815 to endogenous or exogenous factors, even before the prediction error is evaluated. This echoes  
816 the sequential ordering in models of temporal difference learning, where first the agent perceives  
817 its state, and then computes reward prediction errors relevant to that state (Sutton & Barto, 1998).

## 818 **Limitations and Future Directions**

819           While we have hypothesized that execution errors impact choice behavior, either by  
820 attenuating the operation of reinforcement learning processes or via an enhanced sense of  
821 agency, it is also important to consider alternative hypotheses. In the behavioural data we  
822 observed a high base rate for switching between bandits. The highly probabilistic nature of the  
823 outcomes, coupled with the relatively low reward rate increased made the task of determining the  
824 optimal choice difficult (while each bandit different frequencies of execution and selection errors,  
825 they all had the same expected value). This may have biased participants towards an exploration  
826 strategy to reduce uncertainty by focusing on gathering more information about the reward  
827 likelihood of each bandit for later exploitation (Cohen et al., 2007; Daw et al., 2006). Viewed in this  
828 way, repetition of target selection following execution error might not be due to increased agency  
829 or RL discounting but may instead reflect a failure to acquire information on the reward probability  
830 of the chosen target on the previous trial and a drive to reduce uncertainty. Future work could  
831 disentangle these explanations by, for instance, assigning lower expected value to high  
832 execution/low selection error bandits and/or through the presentation of fictive outcomes for motor  
833 errors.

834

## 835 **Conclusion**

836           We observed a robust FRN/RewP in response to both selection and execution errors, but  
837 only the former correlated with behavioral adjustment. In contrast, the amplitude of a positive  
838 deflection in the ERP, both prior and after the FRN/RewP, correlated with choice behavior following  
839 execution errors. These results indicate a need for a more nuanced interpretation of what the  
840 FRN/RewP represents, and how it may be shaped by contextual information. More generally, the  
841 results provide insight into how the brain discriminates between different classes of error to  
842 determine future action.

## 843 **References**

- 844
- 845 Alexander, W. H., & Brown, J. W. (2011). Medial prefrontal cortex as an action-outcome predictor.
- 846 *Nature Neuroscience*, 14(10), 1338–1344. <https://doi.org/10.1038/nn.2921>
- 847 Anguera, J. A., Seidler, R. D., & Gehring, W. J. (2009). Changes in Performance Monitoring During
- 848 Sensorimotor Adaptation. *Journal of Neurophysiology*, 102(3), 1868–1879.
- 849 <https://doi.org/10.1152/jn.00063.2009>
- 850 Bakeman, R. (2005). Recommended effect size statistics for repeated measures designs. *Behavior*
- 851 *Research Methods*, 37(3), 379–384. <https://doi.org/10.3758/BF03192707>
- 852 Benjamini, Y., & Hochberg, Y. (1995). Controlling the False Discovery Rate: A Practical and
- 853 Powerful Approach to Multiple Testing. *Source Journal of the Royal Statistical Society.*
- 854 *Series B (Methodological) Journal of the Royal Statistical Society. Series B J. R. Statist.*
- 855 *Soc. B*, 57(1), 289–300. <https://doi.org/10.2307/2346101>
- 856 Brainard, D. H. (1997). The Psychophysics Toolbox. *Spatial Vision*, 10(4), 433–436.
- 857 <https://doi.org/10.1163/156856897X00357>
- 858 Cavanagh, J. F., Zambrano-Vazquez, L., & Allen, J. J. B. (2012). Theta lingua franca: A common
- 859 mid-frontal substrate for action monitoring processes. *Psychophysiology*, 49(2), 220–238.
- 860 <https://doi.org/10.1111/j.1469-8986.2011.01293.x>
- 861 Chaumon, M., Bishop, D. V. M., & Busch, N. A. (2015). A practical guide to the selection of
- 862 independent components of the electroencephalogram for artifact correction. *Journal of*
- 863 *Neuroscience Methods*, 250, 47–63. <https://doi.org/10.1016/j.jneumeth.2015.02.025>
- 864 Cohen, J. D., McClure, S. M., & Yu, A. J. (2007). Should I stay or should I go? How the human
- 865 brain manages the trade-off between exploitation and exploration. *Philosophical*
- 866 *Transactions of the Royal Society B: Biological Sciences*, 362(1481), 933–942.
- 867 <https://doi.org/10.1098/rstb.2007.2098>
- 868 Daw, N. D., O'Doherty, J. P., Dayan, P., Dolan, R. J., & Seymour, B. (2006). Cortical substrates for
- 869 exploratory decisions in humans. *Nature*, 441(7095), 876–879.
- 870 <https://doi.org/10.1038/nature04766>
- 871 de Bruijn, E. R. A., Hulstijn, W., Meulenbroek, R. G. J., & Van Galen, G. P. (2003). Action
- 872 monitoring in motor control: ERPs following selection and execution errors in a force
- 873 production task. *Psychophysiology*, 40(5), 786–795. [https://doi.org/10.1111/1469-](https://doi.org/10.1111/1469-8986.00079)
- 874 [8986.00079](https://doi.org/10.1111/1469-8986.00079)
- 875 Delorme, A., & Makeig, S. (2004). EEGLAB: an open source toolbox for analysis of single-trial
- 876 EEG dynamics including independent component analysis. *Journal of Neuroscience*
- 877 *Methods*, 134(1), 9–21. <https://doi.org/10.1016/j.jneumeth.2003.10.009>
- 878 Desmurget, M., Epstein, C. M., Turner, R. S., Prablanc, C., Alexander, G. E., & Grafton, S. T.
- 879 (1999). Role of the posterior parietal cortex in updating reaching movements to a visual
- 880 target. *Nature Neuroscience*, 2(6), 563–567. <https://doi.org/10.1038/9219>

- 881 Desmurget, M., Gréa, H., Grethe, J. S., Prablanc, C., Alexander, G. E., & Grafton, S. T. (2001).  
882 Functional anatomy of nonvisual feedback loops during reaching: A positron emission  
883 tomography study. *Journal of Neuroscience*, 21(8), 2919–2928.
- 884 Dhar, M., & Pourtois, G. (2011). Early error detection is generic, but subsequent adaption to errors  
885 is not: Evidence from ERPs. *Neuropsychologia*, 49(5), 1236–1245.  
886 <https://doi.org/10.1016/j.neuropsychologia.2011.01.006>
- 887 Diedenhofen, B., & Musch, J. (2015). Cocor: A comprehensive solution for the statistical  
888 comparison of correlations. *PLoS ONE*, 10(4), 1–12.  
889 <https://doi.org/10.1371/journal.pone.0121945>
- 890 Diedrichsen, J. (2005). Neural Correlates of Reach Errors. *Journal of Neuroscience*, 25(43), 9919–  
891 9931. <https://doi.org/10.1523/JNEUROSCI.1874-05.2005>
- 892 Donchin, E. (1981). Surprise!... Surprise? *Psychophysiology*, 18(5), 493–513.  
893 <https://doi.org/10.1111/j.1469-8986.1981.tb01815.x>
- 894 Donchin, E., & Coles, M. G. (1988). Is the P300 component a manifestation of context updating?  
895 *Behavioral and Brain Sciences*, 11(3), 357–427.  
896 <https://doi.org/10.1017/S0140525X00058027>
- 897 Donkers, F. C., Nieuwenhuis, S., & van Boxtel, G. J. (2005). Mediofrontal negativities in the  
898 absence of responding. *Cognitive Brain Research*, 25(3), 777–787.  
899 <https://doi.org/10.1016/j.cogbrainres.2005.09.007>
- 900 Donkers, F. C., & van Boxtel, G. J. (2005). Mediofrontal negativities to averted gains and losses in  
901 the slot-machine task—A further investigation. *Journal of Psychophysiology*, 19(4), 256–  
902 262. <https://doi.org/10.1027/0269-8803.19.4.256>
- 903 Dunn, O. J., & Clark, V. (1969). Correlation coefficients on the same sets of data. *Journal of the*  
904 *American Statistical Association*, 64(325), 366–377.
- 905 Foti, D., Weinberg, A., Dien, J., & Hajcak, G. (2011). Event-related potential activity in the basal  
906 ganglia differentiates rewards from nonrewards: Temporospatial principal components  
907 analysis and source localization of the feedback negativity. *Human Brain Mapping*, 32(12),  
908 2207–2216. <https://doi.org/10.1002/hbm.21182>
- 909 Gehring, W. J., & Willoughby, A. R. (2002). The medial frontal cortex and the rapid processing of  
910 monetary gains and losses. *Science*, 295(5563), 2279–2282.  
911 <https://doi.org/10.1126/science.1066893>
- 912 Green, C. S., Benson, C., Kersten, D., & Schrater, P. (2010). Alterations in choice behavior by  
913 manipulations of world model. *Proceedings of the National Academy of Sciences*, 107(37),  
914 16401–16406. <https://doi.org/10.1073/pnas.1001709107>
- 915 Groppe, D. M., Urbach, T. P., & Kutas, M. (2011). Mass univariate analysis of event-related brain  
916 potentials/fields I: A critical tutorial review. *Psychophysiology*, 48(12), 1711–1725.  
917 <https://doi.org/10.1111/j.1469-8986.2011.01273.x>



- 918 Hemmelmann, C., Horn, M., Süsse, T., Vollandt, R., & Weiss, S. (2005). New concepts of multiple  
919 tests and their use for evaluating high-dimensional EEG data. *Journal of Neuroscience*  
920 *Methods*, 142(2), 209–217. <https://doi.org/10.1016/j.jneumeth.2004.08.008>
- 921 Hittner, J. B., May, K., & Silver, N. C. (2003). A monte carlo evaluation of tests for comparing  
922 dependent correlations. *Journal of General Psychology*, 130(2), 149–168.  
923 <https://doi.org/10.1080/00221300309601282>
- 924 Holroyd, C. B. (2004). A note on the oddball N200 and the feedback ERN. In *Errors, conflicts, and*  
925 *the brain: Current opinions on performance monitoring*. MPI of Cognitive Neuroscience.
- 926 Holroyd, C. B., & Coles. (2002). The neural basis of human error processing: Reinforcement  
927 learning, dopamine, and the error-related negativity. *Psychological Review*, 109(4), 679–  
928 709. <https://doi.org/10.1037/0033-295X.109.4.679>
- 929 Holroyd, C. B., Hajcak, G., & Larsen, J. T. (2006). The good, the bad and the neutral:  
930 Electrophysiological responses to feedback stimuli. *Brain Research*, 1105(1), 93–101.  
931 <https://doi.org/10.1016/j.brainres.2005.12.015>
- 932 Holroyd, C. B., & Krigolson, O. E. (2007). Reward prediction error signals associated with a  
933 modified time estimation task. *Psychophysiology*, 44(6), 913–917.  
934 <https://doi.org/10.1111/j.1469-8986.2007.00561.x>
- 935 Holroyd, C. B., Pakzad-Vaezi, K. L., & Krigolson, O. E. (2008). The feedback correct-related  
936 positivity: Sensitivity of the event-related brain potential to unexpected positive feedback.  
937 *Psychophysiology*, 45(5), 688–697. <https://doi.org/10.1111/j.1469-8986.2008.00668.x>
- 938 Holroyd, C. B., & Umemoto, A. (2016). The research domain criteria framework: The case for  
939 anterior cingulate cortex. *Neuroscience & Biobehavioral Reviews*, 71, 418–443.  
940 <https://doi.org/10.1016/j.neubiorev.2016.09.021>
- 941 Kappenman, E. S., & Luck, S. J. (2017). Best Practices for Event-Related Potential Research in  
942 Clinical Populations. *Biol Psychiatry Cogn Neurosci Neuroimaging*, 4425, 1–13.  
943 <https://doi.org/10.1016/j.bpsc.2015.11.007.Best>
- 944 Kleiner, M., Brainard, D. H., Pelli, D., Ingling, A., Murray, R., & Broussard, C. (2007). What's new in  
945 Psychtoolbox-3. *Perception*, 36, 1–16. <https://doi.org/10.1068/v070821>
- 946 Krigolson, O. E. (2018). Event-related brain potentials and the study of reward processing:  
947 Methodological considerations. *International Journal of Psychophysiology*, 132, 175–183.  
948 <https://doi.org/10.1016/j.ijpsycho.2017.11.007>
- 949 Krigolson, O. E., & Holroyd, C. B. (2006). Evidence for hierarchical error processing in the human  
950 brain. *Neuroscience*, 137(1), 13–17. <https://doi.org/10.1016/j.neuroscience.2005.10.064>
- 951 Krigolson, O. E., & Holroyd, C. B. (2007a). Hierarchical error processing: Different errors, different  
952 systems. *Brain Research*, 1155, 70–80. <https://doi.org/10.1016/j.brainres.2007.04.024>
- 953 Krigolson, O. E., & Holroyd, C. B. (2007b). Predictive information and error processing: The role of  
954 medial-frontal cortex during motor control. *Psychophysiology*, 44(4), 586–595.  
955 <https://doi.org/10.1111/j.1469-8986.2007.00523.x>

- 956 Krigolson, O. E., Holroyd, C. B., Van Gyn, G., & Heath, M. (2008). Electroencephalographic  
957 correlates of target and outcome errors. *Experimental Brain Research*, *190*(4), 401–411.  
958 <https://doi.org/10.1007/s00221-008-1482-x>
- 959 Lage-Castellanos, A., Martínez-Montes, E., Hernández-Cabrera, J. a, & Galán, L. (2010). False  
960 discovery rate and permutation test: An evaluation in ERP data analysis. *Statistics in*  
961 *Medicine*, *29*(1), 63–74. <https://doi.org/10.1002/sim.3784>
- 962 Luck, S. J., & Gaspelin, N. (2017). How to get statistically significant effects in any ERP experiment  
963 (and why you shouldn't). *Psychophysiology*, *54*(1), 146–157.  
964 <https://doi.org/10.1111/psyp.12639>
- 965 McDougle, S. D., Boggess, M. J., Crossley, M. J., Parvin, D., Ivry, R. B., & Taylor, J. A. (2016).  
966 Credit assignment in movement-dependent reinforcement learning. *Proceedings of the*  
967 *National Academy of Sciences*, *113*(24), 6797–6802.  
968 <https://doi.org/10.1073/pnas.1523669113>
- 969 McDougle, S. D., Butcher, P. A., Parvin, D. E., Mushtaq, F., Niv, Y., Ivry, R. B., & Taylor, J. A.  
970 (2019). Neural Signatures of Prediction Errors in a Decision-Making Task Are Modulated by  
971 Action Execution Failures. *Current Biology*, *29*(10), 1606-1613.e5.  
972 <https://doi.org/10.1016/j.cub.2019.04.011>
- 973 Miltner, W. H., Braun, C. H., & Coles, M. G. (1997). Event-related brain potentials following  
974 incorrect feedback in a time-estimation task: Evidence for a 'generic' neural system for error  
975 detection. *Journal of Cognitive Neuroscience*, *9*(6), 788–798.  
976 <https://doi.org/10.1162/jocn.1997.9.6.788>
- 977 Mushtaq, F., Wilkie, R. M., Mon-Williams, M. A., & Schaefer, A. (2016). Randomised prior  
978 feedback modulates neural signals of outcome monitoring. *NeuroImage*, *125*, 868–879.  
979 <https://doi.org/10.1016/j.neuroimage.2015.10.046>
- 980 Nassar, M. R., Bruckner, R., & Frank, M. J. (2019). Statistical context dictates the relationship  
981 between feedback-related EEG signals and learning. *ELife*, *8*, e46975.  
982 <https://doi.org/10.7554/eLife.46975>
- 983 Nolan, H., Whelan, R., & Reilly, R. B. (2010). FASTER: Fully Automated Statistical Thresholding  
984 for EEG artifact Rejection. *Journal of Neuroscience Methods*, *192*(1), 152–162.  
985 <https://doi.org/10.1016/j.jneumeth.2010.07.015>
- 986 Oken, B. S., & Chiappa, K. H. (1986). Statistical issues concerning computerized analysis of  
987 brainwave topography. *Annals of Neurology*, *19*(5), 493–497.  
988 <https://doi.org/10.1002/ana.410190511>
- 989 Oldfield, R. C. (1971). The assessment and analysis of handedness: The Edinburgh inventory.  
990 *Neuropsychologia*, *9*(1), 97–113. [http://dx.doi.org/10.1016/0028-3932\(71\)90067-4](http://dx.doi.org/10.1016/0028-3932(71)90067-4)
- 991 Olejnik, S., & Algina, J. (2003). Generalized Eta and Omega Squared Statistics: Measures of Effect  
992 Size for Some Common Research Designs. *Psychological Methods*, *8*(4), 434–447.  
993 <https://doi.org/10.1037/1082-989X.8.4.434>

- 994 Oliveira, F. T. P., McDonald, J. J., & Goodman, D. (2007). Performance monitoring in the anterior  
995 cingulate is not all error related: Expectancy deviation and the representation of action-  
996 outcome associations. *Journal of Cognitive Neuroscience*, 19(12), 1994–2004.  
997 <https://doi.org/10.1162/jocn.2007.19.12.1994>
- 998 Oostenveld, R., Fries, P., Maris, E., & Schoffelen, J.-M. (2011). FieldTrip: Open source software for  
999 advanced analysis of MEG, EEG, and invasive electrophysiological data. *Intell.*  
1000 *Neuroscience*, 2011, 1:1-1:9. <https://doi.org/10.1155/2011/156869>
- 1001 Overbeek, T. J. M., Nieuwenhuis, S., & Ridderinkhof, K. R. (2005). Dissociable components of  
1002 error processing—On the functional significance of the Pe Vis-a-vis the ERN/Ne. *Journal of*  
1003 *Psychophysiology*, 19(4), 319–329. <https://doi.org/10.1027/0269-8803.19.4.319>
- 1004 Palidis, D. J., Cashaback, J., & Gribble, P. (2019). Neural Signatures of Reward and Sensory  
1005 Prediction Error in Motor Learning. *Journal of Neurophysiology*, 262576.  
1006 <https://doi.org/10.1152/jn.00792.2018>
- 1007 Parvin, D. E., McDougale, S. D., Taylor, J. A., & Ivry, R. B. (2018). Credit assignment in a motor  
1008 decision making task is influenced by agency and not sensorimotor prediction errors. *The*  
1009 *Journal of Neuroscience*, 38(19), 3601–3617. [https://doi.org/10.1523/JNEUROSCI.3601-](https://doi.org/10.1523/JNEUROSCI.3601-17.2018)  
1010 [17.2018](https://doi.org/10.1523/JNEUROSCI.3601-17.2018)
- 1011 Polich, J. (2007). Updating P300: An integrative theory of P3a and P3b. *Clinical Neurophysiology*,  
1012 118(10), 2128–2148. <https://doi.org/10.1016/j.clinph.2007.04.019>
- 1013 Proudfit, G. H. (2015). The reward positivity: From basic research on reward to a biomarker for  
1014 depression: The reward positivity. *Psychophysiology*, 52(4), 449–459.  
1015 <https://doi.org/10.1111/psyp.12370>
- 1016 R Core Team. (2015). *R: A language and environment for statistical computing*. R Foundation for  
1017 Statistical Computing.
- 1018 Rutiku, R., Martin, M., Bachmann, T., & Aru, J. (2015). Does the P300 reflect conscious perception  
1019 or its consequences? *Neuroscience*, 298, 180–189.  
1020 <https://doi.org/10.1016/j.neuroscience.2015.04.029>
- 1021 Sambrook, T. D., & Goslin, J. (2015). A Neural reward prediction error revealed by a meta-analysis  
1022 of ERPs using great grand averages. *Psychological Bulletin*, 141(1), 213–235.  
1023 <https://doi.org/10.1037/bul0000006>
- 1024 San Martín, R. (2012). Event-related potential studies of outcome processing and feedback-guided  
1025 learning. *Frontiers in Human Neuroscience*, 6. <https://doi.org/10.3389/fnhum.2012.00304>
- 1026 Sidarus, N., Vuorre, M., & Haggard, P. (2017). How action selection influences the sense of  
1027 agency: An ERP study. *NeuroImage*, 150, 1–13.  
1028 <https://doi.org/10.1016/j.neuroimage.2017.02.015>
- 1029 Sutton, R. S., & Barto, A. G. (1998). *Reinforcement Learning: An Introduction*. MIT Press.

- 1030 Torrecillos, F., Albouy, P., Brochier, T., & Malfait, N. (2014). Does the Processing of Sensory and  
1031 Reward-Prediction Errors Involve Common Neural Resources? Evidence from a  
1032 Frontocentral Negative Potential Modulated by Movement Execution Errors. *Journal of*  
1033 *Neuroscience*, 34(14), 4845–4856. <https://doi.org/10.1523/JNEUROSCI.4390-13.2014>
- 1034 Walsh, M. M., & Anderson, J. R. (2012). Learning from experience: Event-related potential  
1035 correlates of reward processing, neural adaptation, and behavioral choice. *Neuroscience*  
1036 *and Biobehavioral Reviews*, 36(8), 1870–1884.  
1037 <https://doi.org/10.1016/j.neubiorev.2012.05.008>
- 1038 Winkler, I., Debener, S., Muller, K. R., & Tangermann, M. (2015). On the influence of high-pass  
1039 filtering on ICA-based artifact reduction in EEG-ERP. *Proceedings of the Annual*  
1040 *International Conference of the IEEE Engineering in Medicine and Biology Society, EMBS,*  
1041 *2015-Novem*, 4101–4105. <https://doi.org/10.1109/EMBC.2015.7319296>
- 1042 Wu, S.-W., Delgado, M. R., & Maloney, L. T. (2009). Economic decision-making compared with an  
1043 equivalent motor task. *Proceedings of the National Academy of Sciences of the United*  
1044 *States of America*, 106(15), 6088–6093. <https://doi.org/10.1073/pnas.0900102106>
- 1045 Yordanova, J., Falkenstein, M., Hohnsbein, J., & Kolev, V. (2004). Parallel systems of error  
1046 processing in the brain. *NeuroImage*, 22(2), 590–602.  
1047 <https://doi.org/10.1016/j.neuroimage.2004.01.040>  
1048
